# Supplementary material for: MRI-Based Radiomics Combined with Deep Learning for Distinguishing IDH-Mutant WHO Grade 4 Astrocytomas from IDH-Wild-Type Glioblastomas
Source: MDPI journal article supplement (doi:10.3390/cancers15030951), 2023-02-02
Supplement: s1 [file s1]

# Supplementary file

Table S1. Radiomics features' name, set, and family extracted in this study

| Set      | Type       | Name                                 |
|----------|------------|--------------------------------------|
| Original | shape      | Maximum3DDiameter                    |
| Original | shape      | Maximum2DDiameterSlice               |
| Original | shape      | Sphericity                           |
| Original | shape      | MinorAxis                            |
| Original | shape      | Elongation                           |
| Original | shape      | SurfaceVolumeRatio                   |
| Original | shape      | Volume                               |
| Original | shape      | MajorAxis                            |
| Original | shape      | SurfaceArea                          |
| Original | shape      | Flatness                             |
| Original | shape      | LeastAxis                            |
| Original | shape      | Maximum2DDiameterColumn              |
| Original | shape      | Maximum2DDiameterRow                 |
| Original | gldm       | DependenceEntropy                    |
| Original | gldm       | DependenceNonUniformity              |
| Original | gldm       | GrayLevelNonUniformity               |
| Original | gldm       | SmallDependenceEmphasis              |
| Original | gldm       | SmallDependenceHighGrayLevelEmphasis |
| Original | gldm       | DependenceNonUniformityNormalized    |
| Original | gldm       | LargeDependenceEmphasis              |
| Original | gldm       | LargeDependenceLowGrayLevelEmphasis  |
| Original | gldm       | DependenceVariance                   |
| Original | gldm       | LargeDependenceHighGrayLevelEmphasis |
| Original | gldm       | SmallDependenceLowGrayLevelEmphasis  |
| Original | firstorder | InterquartileRange                   |
| Original | firstorder | Skewness                             |
| Original | firstorder | Median                               |
| Original | firstorder | Energy                               |
| Original | firstorder | RobustMeanAbsoluteDeviation          |
| Original | firstorder | MeanAbsoluteDeviation                |
| Original | firstorder | TotalEnergy                          |
| Original | firstorder | Maximum                              |
| Original | firstorder | RootMeanSquared                      |

|                 |            |                                  |
|-----------------|------------|----------------------------------|
| <b>Original</b> | firstorder | 90Percentile                     |
| <b>Original</b> | firstorder | Minimum                          |
| <b>Original</b> | firstorder | Range                            |
| <b>Original</b> | firstorder | Variance                         |
| <b>Original</b> | firstorder | 10Percentile                     |
| <b>Original</b> | firstorder | Kurtosis                         |
| <b>Original</b> | firstorder | Mean                             |
| <b>Original</b> | glrlm      | ShortRunLowGrayLevelEmphasis     |
| <b>Original</b> | glrlm      | RunVariance                      |
| <b>Original</b> | glrlm      | GrayLevelNonUniformity           |
| <b>Original</b> | glrlm      | LongRunEmphasis                  |
| <b>Original</b> | glrlm      | ShortRunHighGrayLevelEmphasis    |
| <b>Original</b> | glrlm      | RunLengthNonUniformity           |
| <b>Original</b> | glrlm      | ShortRunEmphasis                 |
| <b>Original</b> | glrlm      | LongRunHighGrayLevelEmphasis     |
| <b>Original</b> | glrlm      | RunPercentage                    |
| <b>Original</b> | glrlm      | LongRunLowGrayLevelEmphasis      |
| <b>Original</b> | glrlm      | RunEntropy                       |
| <b>Original</b> | glrlm      | RunLengthNonUniformityNormalized |
| <b>Original</b> | glszm      | LargeAreaEmphasis                |
| <b>Original</b> | glszm      | SmallAreaHighGrayLevelEmphasis   |
| <b>Original</b> | glszm      | ZonePercentage                   |
| <b>Original</b> | glszm      | LargeAreaLowGrayLevelEmphasis    |
| <b>Original</b> | glszm      | LargeAreaHighGrayLevelEmphasis   |
| <b>Original</b> | glszm      | SmallAreaEmphasis                |
| <b>Original</b> | glszm      | SmallAreaLowGrayLevelEmphasis    |

Figure S1. The area under the curve of AUC (predictive power) heatmap for differentiating IDH-mutant from IDH wild-type grade- 4 astrocytomas employing a variety of feature selections and machine learning classifiers applied to distinct neoplasm subregions

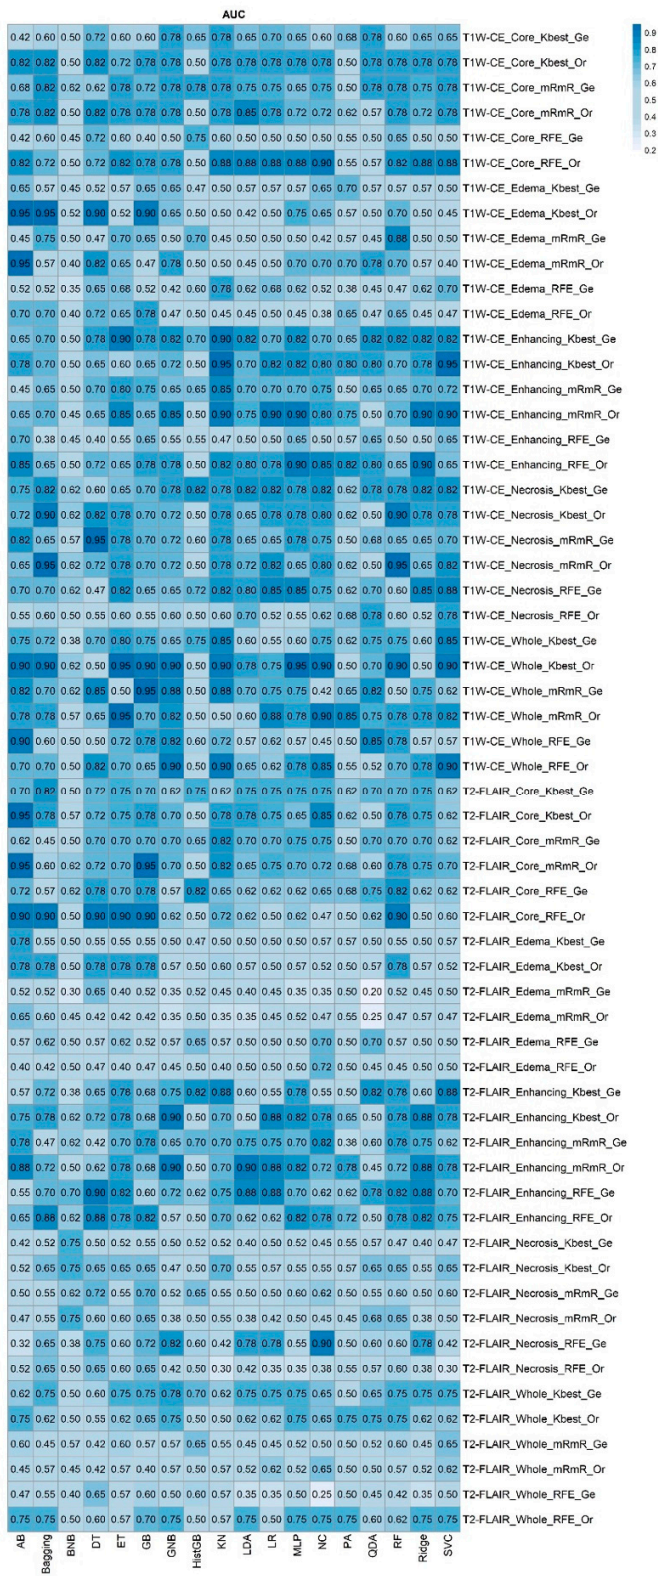





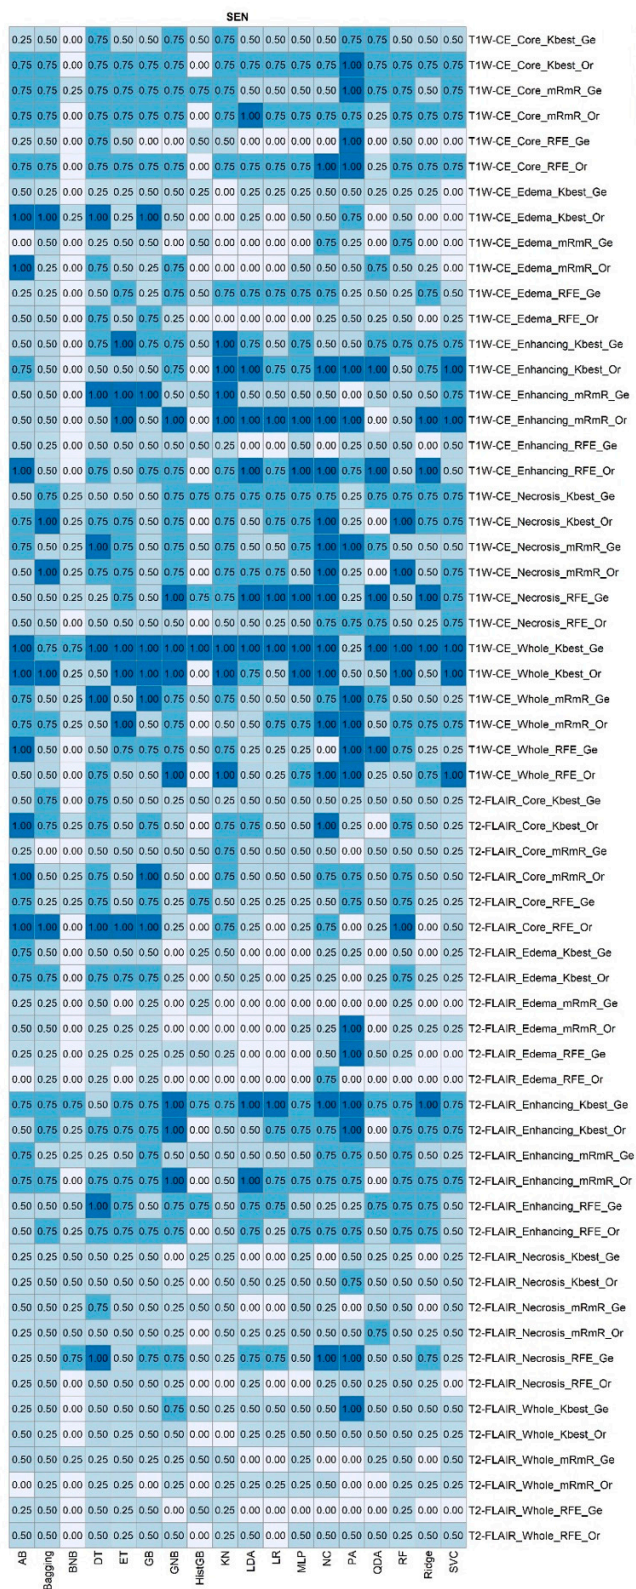

Figure S3. Sensitivity (SEN) heatmap for differentiating IDH-mutant from IDH wild-type grade-4 astrocytomas employing a variety of feature selections and machine learning classifiers applied to distinct neoplasm.

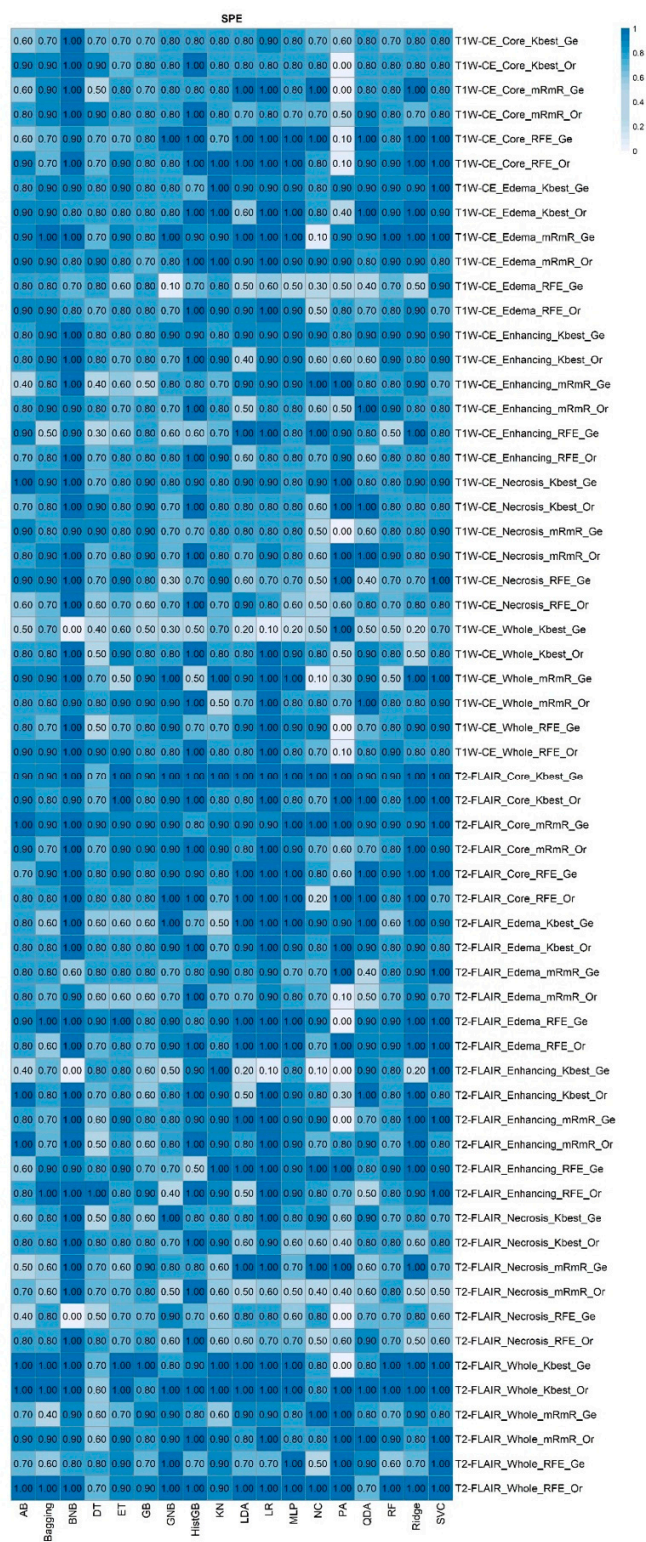

Figure S4. Specificity (SPE) heatmap for differentiating IDH-mutant from IDH wild-type grade- 4 astrocytomas employing a variety of feature selections and machine learning classifiers applied to distinct neoplasm.

## Data splitting:

**Original data:** ['IDH\_Mutant\_1', 'IDH\_Mutant\_2', 'IDH\_Mutant\_3', 'IDH\_Mutant\_4', 'IDH\_Mutant\_5', 'IDH\_Mutant\_6', 'IDH\_Mutant\_7', 'IDH\_Mutant\_8', 'IDH\_Mutant\_9', 'IDH\_Mutant\_10', 'IDH\_Mutant\_11', 'IDH\_Mutant\_12', 'IDH\_Mutant\_13', 'IDH\_Mutant\_14', 'IDH\_Mutant\_15', 'IDH\_Mutant\_16', 'IDH\_Mutant\_17', 'IDH\_Mutant\_18', 'IDH\_Mutant\_19', 'IDH\_Mutant\_20', 'IDH\_Mutant\_21', 'IDH\_Mutant\_22', 'IDH\_Mutant\_23', 'IDH\_Wild\_type\_1', 'IDH\_Wild\_type\_2', 'IDH\_Wild\_type\_3', 'IDH\_Wild\_type\_4', 'IDH\_Wild\_type\_5', 'IDH\_Wild\_type\_6', 'IDH\_Wild\_type\_7', 'IDH\_Wild\_type\_8', 'IDH\_Wild\_type\_9', 'IDH\_Wild\_type\_10', 'IDH\_Wild\_type\_11', 'IDH\_Wild\_type\_12', 'IDH\_Wild\_type\_13', 'IDH\_Wild\_type\_14', 'IDH\_Wild\_type\_15', 'IDH\_Wild\_type\_16', 'IDH\_Wild\_type\_17', 'IDH\_Wild\_type\_18', 'IDH\_Wild\_type\_19', 'IDH\_Wild\_type\_20', 'IDH\_Wild\_type\_21', 'IDH\_Wild\_type\_22', 'IDH\_Wild\_type\_23', 'IDH\_Wild\_type\_24', 'IDH\_Wild\_type\_25', 'IDH\_Wild\_type\_26', 'IDH\_Wild\_type\_27', 'IDH\_Wild\_type\_28', 'IDH\_Wild\_type\_29', 'IDH\_Wild\_type\_30', 'IDH\_Wild\_type\_31', 'IDH\_Wild\_type\_32', 'IDH\_Wild\_type\_33', 'IDH\_Wild\_type\_34']

**Training set:** ['IDH\_Mutant\_3', 'IDH\_Mutant\_23', 'IDH\_Mutant\_19', 'IDH\_Wild\_type\_7', 'IDH\_Wild\_type\_9', 'IDH\_Mutant\_5', 'IDH\_Wild\_type\_1', 'IDH\_Mutant\_13', 'IDH\_Wild\_type\_32', 'IDH\_Wild\_type\_17', 'IDH\_Wild\_type\_26', 'IDH\_Wild\_type\_2', 'IDH\_Wild\_type\_34', 'IDH\_Wild\_type\_22', 'IDH\_Wild\_type\_33', 'IDH\_Wild\_type\_30', 'IDH\_Wild\_type\_10', 'IDH\_Mutant\_14', 'IDH\_Wild\_type\_16', 'IDH\_Mutant\_10', 'IDH\_Wild\_type\_29', 'IDH\_Wild\_type\_18', 'IDH\_Mutant\_1', 'IDH\_Mutant\_20', 'IDH\_Wild\_type\_15', 'IDH\_Wild\_type\_23', 'IDH\_Wild\_type\_8', 'IDH\_Mutant\_21', 'IDH\_Wild\_type\_6', 'IDH\_Wild\_type\_4', 'IDH\_Mutant\_18', 'IDH\_Mutant\_15', 'IDH\_Wild\_type\_12', 'IDH\_Mutant\_11', 'IDH\_Mutant\_16', 'IDH\_Mutant\_8', 'IDH\_Wild\_type\_11', 'IDH\_Wild\_type\_28', 'IDH\_Mutant\_2', 'IDH\_Wild\_type\_13', 'IDH\_Mutant\_6', 'IDH\_Wild\_type\_21', 'IDH\_Wild\_type\_31', 'IDH\_Wild\_type\_20', 'IDH\_Mutant\_9', 'IDH\_Mutant\_22']

**Testing set:** ['IDH\_Mutant\_4', 'IDH\_Mutant\_7', 'IDH\_Mutant\_12', 'IDH\_Mutant\_17', 'IDH\_Wild\_type\_3', 'IDH\_Wild\_type\_5', 'IDH\_Wild\_type\_14', 'IDH\_Wild\_type\_19', 'IDH\_Wild\_type\_24', 'IDH\_Wild\_type\_25', 'IDH\_Wild\_type\_27']

Table S2. The complete result of multi-machine learning algorithms, feature selection, and multi-segmentation approaches in discriminating IDH-mutant grade-4 astrocytomas from IDH wild-type GBMs of generated data with 80:20 training:testing set.

| Approach                  | ML      | AUC        | ACC        | SEN | SPE        | PR_AUC     |
|---------------------------|---------|------------|------------|-----|------------|------------|
| T1w_CE_Core_Kbest         | GNB     | 0.92857143 | 0.91666667 | 1   | 0.85714286 | 0.91666667 |
| T1w_CE_Core_RFE           | PA      | 0.92857143 | 0.91666667 | 1   | 0.85714286 | 0.91666667 |
| T1w_CE_Enhancing_mRmR     | HGB     | 0.92857143 | 0.91666667 | 1   | 0.85714286 | 0.91666667 |
| T2w_Flair_Core_RFE        | KN      | 0.92857143 | 0.91666667 | 1   | 0.85714286 | 0.91666667 |
| T2w_Flair_Enhancing_Kbest | Bagging | 0.92857143 | 0.91666667 | 1   | 0.85714286 | 0.91666667 |
| T2w_Flair_Enhancing_Kbest | DT      | 0.92857143 | 0.91666667 | 1   | 0.85714286 | 0.91666667 |
| T2w_Flair_Enhancing_Kbest | KN      | 0.92857143 | 0.91666667 | 1   | 0.85714286 | 0.91666667 |
| T1w_CE_Core_Kbest         | Bagging | 0.9        | 0.91666667 | 0.8 | 1          | 0.94166667 |
| T1w_CE_Core_Kbest         | GB      | 0.9        | 0.91666667 | 0.8 | 1          | 0.94166667 |
| T1w_CE_Core_Kbest         | HGB     | 0.9        | 0.91666667 | 0.8 | 1          | 0.94166667 |
| T1w_CE_Core_Kbest         | RF      | 0.9        | 0.91666667 | 0.8 | 1          | 0.94166667 |

|                           |         |            |            |     |            |            |
|---------------------------|---------|------------|------------|-----|------------|------------|
| T1w_CE_Core_RFE           | RF      | 0.9        | 0.91666667 | 0.8 | 1          | 0.94166667 |
| T1w_CE_Edema_Kbest        | GNB     | 0.9        | 0.91666667 | 0.8 | 1          | 0.94166667 |
| T1w_CE_Edema_Kbest        | MLPC    | 0.9        | 0.91666667 | 0.8 | 1          | 0.94166667 |
| T1w_CE_Edema_Kbest        | NC      | 0.9        | 0.91666667 | 0.8 | 1          | 0.94166667 |
| T1w_CE_Edema_Kbest        | PA      | 0.9        | 0.91666667 | 0.8 | 1          | 0.94166667 |
| T1w_CE_Edema_Kbest        | QDA     | 0.9        | 0.91666667 | 0.8 | 1          | 0.94166667 |
| T1w_CE_Edema_Kbest        | SVC     | 0.9        | 0.91666667 | 0.8 | 1          | 0.94166667 |
| T1w_CE_Edema_RFE          | NC      | 0.9        | 0.91666667 | 0.8 | 1          | 0.94166667 |
| T1w_CE_Enhancing_Kbest    | QDA     | 0.9        | 0.91666667 | 0.8 | 1          | 0.94166667 |
| T1w_CE_Enhancing_mRmR     | NC      | 0.9        | 0.91666667 | 0.8 | 1          | 0.94166667 |
| T1w_CE_Enhancing_mRmR     | SVC     | 0.9        | 0.91666667 | 0.8 | 1          | 0.94166667 |
| T1w_CE_Enhancing_RFE      | ET      | 0.9        | 0.91666667 | 0.8 | 1          | 0.94166667 |
| T1w_CE_Enhancing_RFE      | GB      | 0.9        | 0.91666667 | 0.8 | 1          | 0.94166667 |
| T1w_CE_Enhancing_RFE      | KN      | 0.9        | 0.91666667 | 0.8 | 1          | 0.94166667 |
| T1w_CE_Enhancing_RFE      | RF      | 0.9        | 0.91666667 | 0.8 | 1          | 0.94166667 |
| T1w_CE_Enhancing_RFE      | SVC     | 0.9        | 0.91666667 | 0.8 | 1          | 0.94166667 |
| T1w_CE_Whole_Kbest        | ET      | 0.9        | 0.91666667 | 0.8 | 1          | 0.94166667 |
| T1w_CE_Whole_Kbest        | GB      | 0.9        | 0.91666667 | 0.8 | 1          | 0.94166667 |
| T1w_CE_Whole_Kbest        | HGB     | 0.9        | 0.91666667 | 0.8 | 1          | 0.94166667 |
| T1w_CE_Whole_Kbest        | SVC     | 0.9        | 0.91666667 | 0.8 | 1          | 0.94166667 |
| T2w_Flair_Whole_Kbest     | AB      | 0.9        | 0.91666667 | 0.8 | 1          | 0.94166667 |
| T1w_CE_Core_Kbest         | LDA     | 0.85714286 | 0.83333333 | 1   | 0.71428571 | 0.85714286 |
| T1w_CE_Core_Kbest         | LR      | 0.85714286 | 0.83333333 | 1   | 0.71428571 | 0.85714286 |
| T1w_CE_Core_Kbest         | MLPC    | 0.85714286 | 0.83333333 | 1   | 0.71428571 | 0.85714286 |
| T1w_CE_Core_Kbest         | NC      | 0.85714286 | 0.83333333 | 1   | 0.71428571 | 0.85714286 |
| T1w_CE_Core_Kbest         | Ridge   | 0.85714286 | 0.83333333 | 1   | 0.71428571 | 0.85714286 |
| T1w_CE_Enhancing_Kbest    | PA      | 0.85714286 | 0.83333333 | 1   | 0.71428571 | 0.85714286 |
| T1w_CE_Enhancing_mRmR     | AB      | 0.85714286 | 0.83333333 | 1   | 0.71428571 | 0.85714286 |
| T1w_CE_Necrosis_Kbest     | NC      | 0.85714286 | 0.83333333 | 1   | 0.71428571 | 0.85714286 |
| T2w_Flair_Core_RFE        | HGB     | 0.85714286 | 0.83333333 | 1   | 0.71428571 | 0.85714286 |
| T2w_Flair_Enhancing_Kbest | GB      | 0.85714286 | 0.83333333 | 1   | 0.71428571 | 0.85714286 |
| T1w_CE_Core_Kbest         | AB      | 0.82857143 | 0.83333333 | 0.8 | 0.85714286 | 0.84166667 |
| T1w_CE_Core_mRmR          | GB      | 0.82857143 | 0.83333333 | 0.8 | 0.85714286 | 0.84166667 |
| T1w_CE_Core_mRmR          | SVC     | 0.82857143 | 0.83333333 | 0.8 | 0.85714286 | 0.84166667 |
| T1w_CE_Enhancing_mRmR     | PA      | 0.82857143 | 0.83333333 | 0.8 | 0.85714286 | 0.84166667 |
| T1w_CE_Enhancing_RFE      | Bagging | 0.82857143 | 0.83333333 | 0.8 | 0.85714286 | 0.84166667 |
| T1w_CE_Enhancing_RFE      | DT      | 0.82857143 | 0.83333333 | 0.8 | 0.85714286 | 0.84166667 |
| T1w_CE_Enhancing_RFE      | HGB     | 0.82857143 | 0.83333333 | 0.8 | 0.85714286 | 0.84166667 |
| T1w_CE_Whole_Kbest        | KN      | 0.82857143 | 0.83333333 | 0.8 | 0.85714286 | 0.84166667 |
| T1w_CE_Whole_Kbest        | NC      | 0.82857143 | 0.83333333 | 0.8 | 0.85714286 | 0.84166667 |



|                           |         |            |            |     |            |            |
|---------------------------|---------|------------|------------|-----|------------|------------|
| T1w_CE_Whole_RFE          | RF      | 0.82857143 | 0.83333333 | 0.8 | 0.85714286 | 0.84166667 |
| T2w_Flair_Core_Kbest      | NC      | 0.82857143 | 0.83333333 | 0.8 | 0.85714286 | 0.84166667 |
| T2w_Flair_Core_mRmR       | Bagging | 0.82857143 | 0.83333333 | 0.8 | 0.85714286 | 0.84166667 |
| T2w_Flair_Core_mRmR       | ET      | 0.82857143 | 0.83333333 | 0.8 | 0.85714286 | 0.84166667 |
| T2w_Flair_Core_mRmR       | GB      | 0.82857143 | 0.83333333 | 0.8 | 0.85714286 | 0.84166667 |
| T2w_Flair_Core_mRmR       | HGB     | 0.82857143 | 0.83333333 | 0.8 | 0.85714286 | 0.84166667 |
| T2w_Flair_Core_mRmR       | KN      | 0.82857143 | 0.83333333 | 0.8 | 0.85714286 | 0.84166667 |
| T2w_Flair_Core_mRmR       | QDA     | 0.82857143 | 0.83333333 | 0.8 | 0.85714286 | 0.84166667 |
| T2w_Flair_Core_mRmR       | RF      | 0.82857143 | 0.83333333 | 0.8 | 0.85714286 | 0.84166667 |
| T2w_Flair_Core_mRmR       | SVC     | 0.82857143 | 0.83333333 | 0.8 | 0.85714286 | 0.84166667 |
| T2w_Flair_Core_RFE        | GNB     | 0.82857143 | 0.83333333 | 0.8 | 0.85714286 | 0.84166667 |
| T2w_Flair_Core_RFE        | LDA     | 0.82857143 | 0.83333333 | 0.8 | 0.85714286 | 0.84166667 |
| T2w_Flair_Core_RFE        | MLPC    | 0.82857143 | 0.83333333 | 0.8 | 0.85714286 | 0.84166667 |
| T2w_Flair_Core_RFE        | QDA     | 0.82857143 | 0.83333333 | 0.8 | 0.85714286 | 0.84166667 |
| T2w_Flair_Core_RFE        | SVC     | 0.82857143 | 0.83333333 | 0.8 | 0.85714286 | 0.84166667 |
| T2w_Flair_Enhancing_Kbest | ET      | 0.82857143 | 0.83333333 | 0.8 | 0.85714286 | 0.84166667 |
| T2w_Flair_Enhancing_Kbest | HGB     | 0.82857143 | 0.83333333 | 0.8 | 0.85714286 | 0.84166667 |
| T2w_Flair_Enhancing_Kbest | RF      | 0.82857143 | 0.83333333 | 0.8 | 0.85714286 | 0.84166667 |
| T2w_Flair_Enhancing_Kbest | HGB     | 0.82857143 | 0.83333333 | 0.8 | 0.85714286 | 0.84166667 |
| T2w_Flair_Enhancing_Kbest | NC      | 0.82857143 | 0.83333333 | 0.8 | 0.85714286 | 0.84166667 |
| T2w_Flair_Enhancing_mRmR  | ET      | 0.82857143 | 0.83333333 | 0.8 | 0.85714286 | 0.84166667 |
| T2w_Flair_Enhancing_mRmR  | RF      | 0.82857143 | 0.83333333 | 0.8 | 0.85714286 | 0.84166667 |
| T2w_Flair_Enhancing_mRmR  | AB      | 0.82857143 | 0.83333333 | 0.8 | 0.85714286 | 0.84166667 |
| T2w_Flair_Enhancing_mRmR  | SVC     | 0.82857143 | 0.83333333 | 0.8 | 0.85714286 | 0.84166667 |
| T2w_Flair_Enhancing_RFE   | NC      | 0.82857143 | 0.83333333 | 0.8 | 0.85714286 | 0.84166667 |
| T2w_Flair_Necrosis_Kbest  | AB      | 0.82857143 | 0.83333333 | 0.8 | 0.85714286 | 0.84166667 |
| T1w_CE_Core_Kbest         | DT      | 0.8        | 0.83333333 | 0.6 | 1          | 0.88333333 |
| T1w_CE_Core_RFE           | AB      | 0.8        | 0.83333333 | 0.6 | 1          | 0.88333333 |
| T1w_CE_Core_RFE           | ET      | 0.8        | 0.83333333 | 0.6 | 1          | 0.88333333 |
| T1w_CE_Core_RFE           | HGB     | 0.8        | 0.83333333 | 0.6 | 1          | 0.88333333 |
| T1w_CE_Core_RFE           | KN      | 0.8        | 0.83333333 | 0.6 | 1          | 0.88333333 |
| T1w_CE_Edema_mRmR         | QDA     | 0.8        | 0.83333333 | 0.6 | 1          | 0.88333333 |
| T1w_CE_Enhancing_Kbest    | ET      | 0.8        | 0.83333333 | 0.6 | 1          | 0.88333333 |
| T1w_CE_Enhancing_Kbest    | GNB     | 0.8        | 0.83333333 | 0.6 | 1          | 0.88333333 |
| T1w_CE_Enhancing_Kbest    | GB      | 0.8        | 0.83333333 | 0.6 | 1          | 0.88333333 |
| T1w_CE_Enhancing_Kbest    | HGB     | 0.8        | 0.83333333 | 0.6 | 1          | 0.88333333 |
| T1w_CE_Enhancing_Kbest    | RF      | 0.8        | 0.83333333 | 0.6 | 1          | 0.88333333 |
| T1w_CE_Enhancing_mRmR     | DT      | 0.8        | 0.83333333 | 0.6 | 1          | 0.88333333 |
| T1w_CE_Enhancing_mRmR     | ET      | 0.8        | 0.83333333 | 0.6 | 1          | 0.88333333 |
| T1w_CE_Enhancing_mRmR     | RF      | 0.8        | 0.83333333 | 0.6 | 1          | 0.88333333 |

|                           |         |            |            |     |            |            |
|---------------------------|---------|------------|------------|-----|------------|------------|
| T1w_CE_Enhancing_RFE      | MLPC    | 0.8        | 0.83333333 | 0.6 | 1          | 0.88333333 |
| T1w_CE_Enhancing_RFE      | QDA     | 0.8        | 0.83333333 | 0.6 | 1          | 0.88333333 |
| T1w_CE_Whole_Kbest        | DT      | 0.8        | 0.83333333 | 0.6 | 1          | 0.88333333 |
| T1w_CE_Whole_Kbest        | MLPC    | 0.8        | 0.83333333 | 0.6 | 1          | 0.88333333 |
| T1w_CE_Whole_Kbest        | RF      | 0.8        | 0.83333333 | 0.6 | 1          | 0.88333333 |
| T1w_CE_Whole_RFE          | DT      | 0.8        | 0.83333333 | 0.6 | 1          | 0.88333333 |
| T2w_Flair_Core_mRmR       | AB      | 0.8        | 0.83333333 | 0.6 | 1          | 0.88333333 |
| T2w_Flair_Enhancing_Kbest | SVC     | 0.8        | 0.83333333 | 0.6 | 1          | 0.88333333 |
| T2w_Flair_Enhancing_RFE   | GB      | 0.8        | 0.83333333 | 0.6 | 1          | 0.88333333 |
| T2w_Flair_Enhancing_RFE   | KN      | 0.8        | 0.83333333 | 0.6 | 1          | 0.88333333 |
| T2w_Flair_Enhancing_RFE   | RF      | 0.8        | 0.83333333 | 0.6 | 1          | 0.88333333 |
| T2w_Flair_Whole_Kbest     | Bagging | 0.8        | 0.83333333 | 0.6 | 1          | 0.88333333 |
| T2w_Flair_Whole_Kbest     | ET      | 0.8        | 0.83333333 | 0.6 | 1          | 0.88333333 |
| T2w_Flair_Whole_Kbest     | GB      | 0.8        | 0.83333333 | 0.6 | 1          | 0.88333333 |
| T2w_Flair_Whole_Kbest     | KN      | 0.8        | 0.83333333 | 0.6 | 1          | 0.88333333 |
| T2w_Flair_Whole_Kbest     | RF      | 0.8        | 0.83333333 | 0.6 | 1          | 0.88333333 |
| T2w_Flair_Whole_mRmR      | ET      | 0.8        | 0.83333333 | 0.6 | 1          | 0.88333333 |
| T2w_Flair_Whole_mRmR      | KN      | 0.8        | 0.83333333 | 0.6 | 1          | 0.88333333 |
| T2w_Flair_Whole_mRmR      | RF      | 0.8        | 0.83333333 | 0.6 | 1          | 0.88333333 |
| T2w_Flair_Whole_RFE       | GB      | 0.8        | 0.83333333 | 0.6 | 1          | 0.88333333 |
| T1w_CE_Edema_Kbest        | AB      | 0.78571429 | 0.75       | 1   | 0.57142857 | 0.8125     |
| T1w_CE_Enhancing_RFE      | AB      | 0.78571429 | 0.75       | 1   | 0.57142857 | 0.8125     |
| T1w_CE_Core_mRmR          | MLPC    | 0.75714286 | 0.75       | 0.8 | 0.71428571 | 0.775      |
| T1w_CE_Core_mRmR          | QDA     | 0.75714286 | 0.75       | 0.8 | 0.71428571 | 0.775      |
| T1w_CE_Enhancing_mRmR     | GB      | 0.75714286 | 0.75       | 0.8 | 0.71428571 | 0.775      |
| T1w_CE_Necrosis_Kbest     | AB      | 0.75714286 | 0.75       | 0.8 | 0.71428571 | 0.775      |
| T1w_CE_Necrosis_RFE       | SVC     | 0.75714286 | 0.75       | 0.8 | 0.71428571 | 0.775      |
| T1w_CE_Whole_RFE          | ET      | 0.75714286 | 0.75       | 0.8 | 0.71428571 | 0.775      |
| T1w_CE_Whole_RFE          | HGB     | 0.75714286 | 0.75       | 0.8 | 0.71428571 | 0.775      |
| T2w_Flair_Core_RFE        | AB      | 0.75714286 | 0.75       | 0.8 | 0.71428571 | 0.775      |
| T2w_Flair_Enhancing_mRmR  | Bagging | 0.75714286 | 0.75       | 0.8 | 0.71428571 | 0.775      |
| T2w_Flair_Enhancing_mRmR  | GB      | 0.75714286 | 0.75       | 0.8 | 0.71428571 | 0.775      |
| T1w_CE_Core_mRmR          | Bagging | 0.72857143 | 0.75       | 0.6 | 0.85714286 | 0.75833333 |
| T1w_CE_Core_mRmR          | GNB     | 0.72857143 | 0.75       | 0.6 | 0.85714286 | 0.75833333 |
| T1w_CE_Necrosis_Kbest     | SVC     | 0.72857143 | 0.75       | 0.6 | 0.85714286 | 0.75833333 |
| T1w_CE_Necrosis_mRmR      | KN      | 0.72857143 | 0.75       | 0.6 | 0.85714286 | 0.75833333 |
| T1w_CE_Necrosis_mRmR      | LDA     | 0.72857143 | 0.75       | 0.6 | 0.85714286 | 0.75833333 |
| T1w_CE_Necrosis_mRmR      | LR      | 0.72857143 | 0.75       | 0.6 | 0.85714286 | 0.75833333 |
| T1w_CE_Necrosis_mRmR      | Ridge   | 0.72857143 | 0.75       | 0.6 | 0.85714286 | 0.75833333 |
| T1w_CE_Necrosis_mRmR      | SVC     | 0.72857143 | 0.75       | 0.6 | 0.85714286 | 0.75833333 |

|                           |         |            |            |     |            |            |
|---------------------------|---------|------------|------------|-----|------------|------------|
| T1w_CE_Necrosis_RFE       | MLPC    | 0.72857143 | 0.75       | 0.6 | 0.85714286 | 0.75833333 |
| T1w_CE_Whole_Kbest        | AB      | 0.72857143 | 0.75       | 0.6 | 0.85714286 | 0.75833333 |
| T1w_CE_Whole_Kbest        | Bagging | 0.72857143 | 0.75       | 0.6 | 0.85714286 | 0.75833333 |
| T1w_CE_Whole_Kbest        | PA      | 0.72857143 | 0.75       | 0.6 | 0.85714286 | 0.75833333 |
| T1w_CE_Whole_mRmR         | DT      | 0.72857143 | 0.75       | 0.6 | 0.85714286 | 0.75833333 |
| T1w_CE_Whole_mRmR         | RF      | 0.72857143 | 0.75       | 0.6 | 0.85714286 | 0.75833333 |
| T1w_CE_Whole_RFE          | Bagging | 0.72857143 | 0.75       | 0.6 | 0.85714286 | 0.75833333 |
| T1w_CE_Whole_RFE          | GB      | 0.72857143 | 0.75       | 0.6 | 0.85714286 | 0.75833333 |
| T1w_CE_Whole_RFE          | KN      | 0.72857143 | 0.75       | 0.6 | 0.85714286 | 0.75833333 |
| T2w_Flair_Core_mRmR       | MLPC    | 0.72857143 | 0.75       | 0.6 | 0.85714286 | 0.75833333 |
| T2w_Flair_Core_RFE        | Ridge   | 0.72857143 | 0.75       | 0.6 | 0.85714286 | 0.75833333 |
| T2w_Flair_Edema_Kbest     | Bagging | 0.72857143 | 0.75       | 0.6 | 0.85714286 | 0.75833333 |
| T2w_Flair_Edema_RFE       | AB      | 0.72857143 | 0.75       | 0.6 | 0.85714286 | 0.75833333 |
| T2w_Flair_Edema_RFE       | DT      | 0.72857143 | 0.75       | 0.6 | 0.85714286 | 0.75833333 |
| T2w_Flair_Enhancing_Kbest | MLPC    | 0.72857143 | 0.75       | 0.6 | 0.85714286 | 0.75833333 |
| T2w_Flair_Enhancing_mRmR  | MLPC    | 0.72857143 | 0.75       | 0.6 | 0.85714286 | 0.75833333 |
| T2w_Flair_Enhancing_mRmR  | SVC     | 0.72857143 | 0.75       | 0.6 | 0.85714286 | 0.75833333 |
| T2w_Flair_Enhancing_mRmR  | KN      | 0.72857143 | 0.75       | 0.6 | 0.85714286 | 0.75833333 |
| T2w_Flair_Enhancing_RFE   | ET      | 0.72857143 | 0.75       | 0.6 | 0.85714286 | 0.75833333 |
| T2w_Flair_Enhancing_RFE   | HGB     | 0.72857143 | 0.75       | 0.6 | 0.85714286 | 0.75833333 |
| T2w_Flair_Enhancing_RFE   | RF      | 0.72857143 | 0.75       | 0.6 | 0.85714286 | 0.75833333 |
| T2w_Flair_Whole_Kbest     | HGB     | 0.72857143 | 0.75       | 0.6 | 0.85714286 | 0.75833333 |
| T2w_Flair_Whole_mRmR      | DT      | 0.72857143 | 0.75       | 0.6 | 0.85714286 | 0.75833333 |
| T2w_Flair_Whole_RFE       | Bagging | 0.72857143 | 0.75       | 0.6 | 0.85714286 | 0.75833333 |
| T2w_Flair_Whole_RFE       | ET      | 0.72857143 | 0.75       | 0.6 | 0.85714286 | 0.75833333 |
| T2w_Flair_Whole_RFE       | GNB     | 0.72857143 | 0.75       | 0.6 | 0.85714286 | 0.75833333 |
| T2w_Flair_Whole_RFE       | HGB     | 0.72857143 | 0.75       | 0.6 | 0.85714286 | 0.75833333 |
| T2w_Flair_Whole_RFE       | MLPC    | 0.72857143 | 0.75       | 0.6 | 0.85714286 | 0.75833333 |
| T2w_Flair_Whole_RFE       | RF      | 0.72857143 | 0.75       | 0.6 | 0.85714286 | 0.75833333 |
| T2w_Flair_Whole_RFE       | SVC     | 0.72857143 | 0.75       | 0.6 | 0.85714286 | 0.75833333 |
| T1w_CE_Core_mRmR          | HGB     | 0.71428571 | 0.66666667 | 1   | 0.42857143 | 0.77777778 |
| T2w_Flair_Whole_Kbest     | DT      | 0.71428571 | 0.66666667 | 1   | 0.42857143 | 0.77777778 |
| T1w_CE_Core_mRmR          | LR      | 0.7        | 0.75       | 0.4 | 1          | 0.825      |
| T1w_CE_Core_mRmR          | Ridge   | 0.7        | 0.75       | 0.4 | 1          | 0.825      |
| T1w_CE_Core_RFE           | Bagging | 0.7        | 0.75       | 0.4 | 1          | 0.825      |
| T1w_CE_Core_RFE           | DT      | 0.7        | 0.75       | 0.4 | 1          | 0.825      |
| T1w_CE_Core_RFE           | GNB     | 0.7        | 0.75       | 0.4 | 1          | 0.825      |
| T1w_CE_Core_RFE           | GB      | 0.7        | 0.75       | 0.4 | 1          | 0.825      |
| T1w_CE_Core_RFE           | QDA     | 0.7        | 0.75       | 0.4 | 1          | 0.825      |
| T1w_CE_Core_RFE           | SVC     | 0.7        | 0.75       | 0.4 | 1          | 0.825      |

|                         |         |     |      |     |   |       |
|-------------------------|---------|-----|------|-----|---|-------|
| T1w_CE_Edema_Kbest      | LDA     | 0.7 | 0.75 | 0.4 | 1 | 0.825 |
| T1w_CE_Edema_Kbest      | LR      | 0.7 | 0.75 | 0.4 | 1 | 0.825 |
| T1w_CE_Edema_Kbest      | Ridge   | 0.7 | 0.75 | 0.4 | 1 | 0.825 |
| T1w_CE_Edema_mRmR       | Bagging | 0.7 | 0.75 | 0.4 | 1 | 0.825 |
| T1w_CE_Edema_mRmR       | ET      | 0.7 | 0.75 | 0.4 | 1 | 0.825 |
| T1w_CE_Edema_mRmR       | KN      | 0.7 | 0.75 | 0.4 | 1 | 0.825 |
| T1w_CE_Edema_mRmR       | MLPC    | 0.7 | 0.75 | 0.4 | 1 | 0.825 |
| T1w_CE_Edema_mRmR       | SVC     | 0.7 | 0.75 | 0.4 | 1 | 0.825 |
| T1w_CE_Enhancing_Kbest  | Bagging | 0.7 | 0.75 | 0.4 | 1 | 0.825 |
| T1w_CE_Enhancing_Kbest  | DT      | 0.7 | 0.75 | 0.4 | 1 | 0.825 |
| T1w_CE_Enhancing_Kbest  | KN      | 0.7 | 0.75 | 0.4 | 1 | 0.825 |
| T1w_CE_Whole_Kbest      | GNB     | 0.7 | 0.75 | 0.4 | 1 | 0.825 |
| T1w_CE_Whole_Kbest      | LDA     | 0.7 | 0.75 | 0.4 | 1 | 0.825 |
| T1w_CE_Whole_Kbest      | LR      | 0.7 | 0.75 | 0.4 | 1 | 0.825 |
| T1w_CE_Whole_Kbest      | QDA     | 0.7 | 0.75 | 0.4 | 1 | 0.825 |
| T1w_CE_Whole_Kbest      | Ridge   | 0.7 | 0.75 | 0.4 | 1 | 0.825 |
| T1w_CE_Whole_mRmR       | LDA     | 0.7 | 0.75 | 0.4 | 1 | 0.825 |
| T1w_CE_Whole_mRmR       | MLPC    | 0.7 | 0.75 | 0.4 | 1 | 0.825 |
| T1w_CE_Whole_mRmR       | NC      | 0.7 | 0.75 | 0.4 | 1 | 0.825 |
| T1w_CE_Whole_mRmR       | QDA     | 0.7 | 0.75 | 0.4 | 1 | 0.825 |
| T1w_CE_Whole_mRmR       | Ridge   | 0.7 | 0.75 | 0.4 | 1 | 0.825 |
| T1w_CE_Whole_mRmR       | SVC     | 0.7 | 0.75 | 0.4 | 1 | 0.825 |
| T1w_CE_Whole_RFE        | GNB     | 0.7 | 0.75 | 0.4 | 1 | 0.825 |
| T1w_CE_Whole_RFE        | MLPC    | 0.7 | 0.75 | 0.4 | 1 | 0.825 |
| T1w_CE_Whole_RFE        | QDA     | 0.7 | 0.75 | 0.4 | 1 | 0.825 |
| T1w_CE_Whole_RFE        | SVC     | 0.7 | 0.75 | 0.4 | 1 | 0.825 |
| T2w_Flair_Core_mRmR     | LDA     | 0.7 | 0.75 | 0.4 | 1 | 0.825 |
| T2w_Flair_Core_mRmR     | Ridge   | 0.7 | 0.75 | 0.4 | 1 | 0.825 |
| T2w_Flair_Edema_Kbest   | GNB     | 0.7 | 0.75 | 0.4 | 1 | 0.825 |
| T2w_Flair_Edema_Kbest   | HGB     | 0.7 | 0.75 | 0.4 | 1 | 0.825 |
| T2w_Flair_Edema_mRmR    | ET      | 0.7 | 0.75 | 0.4 | 1 | 0.825 |
| T2w_Flair_Edema_mRmR    | GNB     | 0.7 | 0.75 | 0.4 | 1 | 0.825 |
| T2w_Flair_Edema_mRmR    | HGB     | 0.7 | 0.75 | 0.4 | 1 | 0.825 |
| T2w_Flair_Edema_mRmR    | MLPC    | 0.7 | 0.75 | 0.4 | 1 | 0.825 |
| T2w_Flair_Edema_mRmR    | RF      | 0.7 | 0.75 | 0.4 | 1 | 0.825 |
| T2w_Flair_Edema_RFE     | ET      | 0.7 | 0.75 | 0.4 | 1 | 0.825 |
| T2w_Flair_Edema_RFE     | GB      | 0.7 | 0.75 | 0.4 | 1 | 0.825 |
| T2w_Flair_Edema_RFE     | HGB     | 0.7 | 0.75 | 0.4 | 1 | 0.825 |
| T2w_Flair_Enhancing_RFE | SVC     | 0.7 | 0.75 | 0.4 | 1 | 0.825 |
| T2w_Flair_Enhancing_RFE | Bagging | 0.7 | 0.75 | 0.4 | 1 | 0.825 |



|                           |         |            |            |     |            |            |
|---------------------------|---------|------------|------------|-----|------------|------------|
| T2w_Flair_Enhancing_RFE   | DT      | 0.7        | 0.75       | 0.4 | 1          | 0.825      |
| T2w_Flair_Enhancing_RFE   | ET      | 0.7        | 0.75       | 0.4 | 1          | 0.825      |
| T2w_Flair_Whole_Kbest     | QDA     | 0.7        | 0.75       | 0.4 | 1          | 0.825      |
| T2w_Flair_Whole_Kbest     | SVC     | 0.7        | 0.75       | 0.4 | 1          | 0.825      |
| T2w_Flair_Whole_mRmR      | AB      | 0.7        | 0.75       | 0.4 | 1          | 0.825      |
| T2w_Flair_Whole_mRmR      | GB      | 0.7        | 0.75       | 0.4 | 1          | 0.825      |
| T2w_Flair_Whole_mRmR      | LDA     | 0.7        | 0.75       | 0.4 | 1          | 0.825      |
| T2w_Flair_Whole_mRmR      | LR      | 0.7        | 0.75       | 0.4 | 1          | 0.825      |
| T2w_Flair_Whole_mRmR      | MLPC    | 0.7        | 0.75       | 0.4 | 1          | 0.825      |
| T2w_Flair_Whole_mRmR      | Ridge   | 0.7        | 0.75       | 0.4 | 1          | 0.825      |
| T2w_Flair_Whole_mRmR      | SVC     | 0.7        | 0.75       | 0.4 | 1          | 0.825      |
| T1w_CE_Core_mRmR          | AB      | 0.68571429 | 0.66666667 | 0.8 | 0.57142857 | 0.72738095 |
| T1w_CE_Core_mRmR          | ET      | 0.68571429 | 0.66666667 | 0.8 | 0.57142857 | 0.72738095 |
| T1w_CE_Necrosis_RFE       | HGB     | 0.68571429 | 0.66666667 | 0.8 | 0.57142857 | 0.72738095 |
| T1w_CE_Whole_mRmR         | PA      | 0.68571429 | 0.66666667 | 0.8 | 0.57142857 | 0.72738095 |
| T2w_Flair_Core_Kbest      | ET      | 0.68571429 | 0.66666667 | 0.8 | 0.57142857 | 0.72738095 |
| T2w_Flair_Core_RFE        | Bagging | 0.68571429 | 0.66666667 | 0.8 | 0.57142857 | 0.72738095 |
| T2w_Flair_Core_RFE        | DT      | 0.68571429 | 0.66666667 | 0.8 | 0.57142857 | 0.72738095 |
| T2w_Flair_Core_RFE        | ET      | 0.68571429 | 0.66666667 | 0.8 | 0.57142857 | 0.72738095 |
| T2w_Flair_Core_RFE        | GB      | 0.68571429 | 0.66666667 | 0.8 | 0.57142857 | 0.72738095 |
| T2w_Flair_Core_RFE        | RF      | 0.68571429 | 0.66666667 | 0.8 | 0.57142857 | 0.72738095 |
| T2w_Flair_Enhancing_Kbest | Bagging | 0.68571429 | 0.66666667 | 0.8 | 0.57142857 | 0.72738095 |
| T2w_Flair_Enhancing_Kbest | DT      | 0.68571429 | 0.66666667 | 0.8 | 0.57142857 | 0.72738095 |
| T2w_Flair_Enhancing_Kbest | ET      | 0.68571429 | 0.66666667 | 0.8 | 0.57142857 | 0.72738095 |
| T2w_Flair_Enhancing_Kbest | GB      | 0.68571429 | 0.66666667 | 0.8 | 0.57142857 | 0.72738095 |
| T2w_Flair_Enhancing_Kbest | RF      | 0.68571429 | 0.66666667 | 0.8 | 0.57142857 | 0.72738095 |
| T2w_Flair_Enhancing_mRmR  | AB      | 0.68571429 | 0.66666667 | 0.8 | 0.57142857 | 0.72738095 |
| T2w_Flair_Enhancing_mRmR  | DT      | 0.68571429 | 0.66666667 | 0.8 | 0.57142857 | 0.72738095 |
| T2w_Flair_Enhancing_mRmR  | GB      | 0.68571429 | 0.66666667 | 0.8 | 0.57142857 | 0.72738095 |
| T2w_Flair_Enhancing_mRmR  | HGB     | 0.68571429 | 0.66666667 | 0.8 | 0.57142857 | 0.72738095 |
| T2w_Flair_Enhancing_RFE   | PA      | 0.68571429 | 0.66666667 | 0.8 | 0.57142857 | 0.72738095 |
| T1w_CE_Core_mRmR          | KN      | 0.65714286 | 0.66666667 | 0.6 | 0.71428571 | 0.68333333 |
| T1w_CE_Edema_mRmR         | DT      | 0.65714286 | 0.66666667 | 0.6 | 0.71428571 | 0.68333333 |
| T1w_CE_Enhancing_mRmR     | KN      | 0.65714286 | 0.66666667 | 0.6 | 0.71428571 | 0.68333333 |
| T1w_CE_Necrosis_Kbest     | DT      | 0.65714286 | 0.66666667 | 0.6 | 0.71428571 | 0.68333333 |
| T1w_CE_Necrosis_Kbest     | ET      | 0.65714286 | 0.66666667 | 0.6 | 0.71428571 | 0.68333333 |
| T1w_CE_Necrosis_Kbest     | KN      | 0.65714286 | 0.66666667 | 0.6 | 0.71428571 | 0.68333333 |
| T1w_CE_Necrosis_Kbest     | LDA     | 0.65714286 | 0.66666667 | 0.6 | 0.71428571 | 0.68333333 |
| T1w_CE_Necrosis_Kbest     | LR      | 0.65714286 | 0.66666667 | 0.6 | 0.71428571 | 0.68333333 |
| T1w_CE_Necrosis_Kbest     | MLPC    | 0.65714286 | 0.66666667 | 0.6 | 0.71428571 | 0.68333333 |

|                           |         |            |            |     |            |            |
|---------------------------|---------|------------|------------|-----|------------|------------|
| T1w_CE_Necrosis_Kbest     | QDA     | 0.65714286 | 0.66666667 | 0.6 | 0.71428571 | 0.68333333 |
| T1w_CE_Necrosis_Kbest     | RF      | 0.65714286 | 0.66666667 | 0.6 | 0.71428571 | 0.68333333 |
| T1w_CE_Necrosis_Kbest     | Ridge   | 0.65714286 | 0.66666667 | 0.6 | 0.71428571 | 0.68333333 |
| T1w_CE_Necrosis_mRmR      | ET      | 0.65714286 | 0.66666667 | 0.6 | 0.71428571 | 0.68333333 |
| T1w_CE_Necrosis_mRmR      | GNB     | 0.65714286 | 0.66666667 | 0.6 | 0.71428571 | 0.68333333 |
| T1w_CE_Necrosis_mRmR      | GB      | 0.65714286 | 0.66666667 | 0.6 | 0.71428571 | 0.68333333 |
| T1w_CE_Necrosis_mRmR      | HGB     | 0.65714286 | 0.66666667 | 0.6 | 0.71428571 | 0.68333333 |
| T1w_CE_Necrosis_mRmR      | MLPC    | 0.65714286 | 0.66666667 | 0.6 | 0.71428571 | 0.68333333 |
| T1w_CE_Necrosis_mRmR      | NC      | 0.65714286 | 0.66666667 | 0.6 | 0.71428571 | 0.68333333 |
| T1w_CE_Necrosis_mRmR      | QDA     | 0.65714286 | 0.66666667 | 0.6 | 0.71428571 | 0.68333333 |
| T1w_CE_Necrosis_mRmR      | RF      | 0.65714286 | 0.66666667 | 0.6 | 0.71428571 | 0.68333333 |
| T1w_CE_Whole_mRmR         | GB      | 0.65714286 | 0.66666667 | 0.6 | 0.71428571 | 0.68333333 |
| T1w_CE_Whole_mRmR         | HGB     | 0.65714286 | 0.66666667 | 0.6 | 0.71428571 | 0.68333333 |
| T1w_CE_Whole_RFE          | AB      | 0.65714286 | 0.66666667 | 0.6 | 0.71428571 | 0.68333333 |
| T2w_Flair_Core_Kbest      | GB      | 0.65714286 | 0.66666667 | 0.6 | 0.71428571 | 0.68333333 |
| T2w_Flair_Edema_mRmR      | PA      | 0.65714286 | 0.66666667 | 0.6 | 0.71428571 | 0.68333333 |
| T2w_Flair_Enhancing_Kbest | KN      | 0.65714286 | 0.66666667 | 0.6 | 0.71428571 | 0.68333333 |
| T2w_Flair_Enhancing_Kbest | QDA     | 0.65714286 | 0.66666667 | 0.6 | 0.71428571 | 0.68333333 |
| T2w_Flair_Enhancing_Kbest | SVC     | 0.65714286 | 0.66666667 | 0.6 | 0.71428571 | 0.68333333 |
| T2w_Flair_Enhancing_mRmR  | HGB     | 0.65714286 | 0.66666667 | 0.6 | 0.71428571 | 0.68333333 |
| T2w_Flair_Enhancing_RFE   | Bagging | 0.65714286 | 0.66666667 | 0.6 | 0.71428571 | 0.68333333 |
| T2w_Flair_Whole_Kbest     | PA      | 0.65714286 | 0.66666667 | 0.6 | 0.71428571 | 0.68333333 |
| T2w_Flair_Whole_mRmR      | Bagging | 0.65714286 | 0.66666667 | 0.6 | 0.71428571 | 0.68333333 |
| T2w_Flair_Whole_mRmR      | GNB     | 0.65714286 | 0.66666667 | 0.6 | 0.71428571 | 0.68333333 |
| T2w_Flair_Whole_mRmR      | NC      | 0.65714286 | 0.66666667 | 0.6 | 0.71428571 | 0.68333333 |
| T2w_Flair_Whole_RFE       | AB      | 0.65714286 | 0.66666667 | 0.6 | 0.71428571 | 0.68333333 |
| T2w_Flair_Whole_RFE       | DT      | 0.65714286 | 0.66666667 | 0.6 | 0.71428571 | 0.68333333 |
| T1w_CE_Necrosis_RFE       | QDA     | 0.64285714 | 0.58333333 | 1   | 0.28571429 | 0.75       |
| T2w_Flair_Whole_RFE       | PA      | 0.64285714 | 0.58333333 | 1   | 0.28571429 | 0.75       |
| T1w_CE_Core_mRmR          | LDA     | 0.62857143 | 0.66666667 | 0.4 | 0.85714286 | 0.65833333 |
| T1w_CE_Edema_mRmR         | AB      | 0.62857143 | 0.66666667 | 0.4 | 0.85714286 | 0.65833333 |
| T1w_CE_Edema_mRmR         | HGB     | 0.62857143 | 0.66666667 | 0.4 | 0.85714286 | 0.65833333 |
| T1w_CE_Necrosis_mRmR      | AB      | 0.62857143 | 0.66666667 | 0.4 | 0.85714286 | 0.65833333 |
| T1w_CE_Necrosis_mRmR      | Bagging | 0.62857143 | 0.66666667 | 0.4 | 0.85714286 | 0.65833333 |
| T1w_CE_Whole_mRmR         | Bagging | 0.62857143 | 0.66666667 | 0.4 | 0.85714286 | 0.65833333 |
| T1w_CE_Whole_mRmR         | ET      | 0.62857143 | 0.66666667 | 0.4 | 0.85714286 | 0.65833333 |
| T2w_Flair_Core_Kbest      | KN      | 0.62857143 | 0.66666667 | 0.4 | 0.85714286 | 0.65833333 |
| T2w_Flair_Core_RFE        | LR      | 0.62857143 | 0.66666667 | 0.4 | 0.85714286 | 0.65833333 |
| T2w_Flair_Edema_Kbest     | AB      | 0.62857143 | 0.66666667 | 0.4 | 0.85714286 | 0.65833333 |
| T2w_Flair_Edema_Kbest     | DT      | 0.62857143 | 0.66666667 | 0.4 | 0.85714286 | 0.65833333 |

|                           |         |            |            |     |            |            |
|---------------------------|---------|------------|------------|-----|------------|------------|
| T2w_Flair_Edema_mRmR      | AB      | 0.62857143 | 0.66666667 | 0.4 | 0.85714286 | 0.65833333 |
| T2w_Flair_Enhancing_Kbest | GNB     | 0.62857143 | 0.66666667 | 0.4 | 0.85714286 | 0.65833333 |
| T2w_Flair_Enhancing_Kbest | MLPC    | 0.62857143 | 0.66666667 | 0.4 | 0.85714286 | 0.65833333 |
| T2w_Flair_Enhancing_Kbest | GNB     | 0.62857143 | 0.66666667 | 0.4 | 0.85714286 | 0.65833333 |
| T2w_Flair_Enhancing_Kbest | QDA     | 0.62857143 | 0.66666667 | 0.4 | 0.85714286 | 0.65833333 |
| T2w_Flair_Enhancing_mRmR  | KN      | 0.62857143 | 0.66666667 | 0.4 | 0.85714286 | 0.65833333 |
| T2w_Flair_Enhancing_RFE   | KN      | 0.62857143 | 0.66666667 | 0.4 | 0.85714286 | 0.65833333 |
| T2w_Flair_Enhancing_RFE   | AB      | 0.62857143 | 0.66666667 | 0.4 | 0.85714286 | 0.65833333 |
| T2w_Flair_Enhancing_RFE   | GB      | 0.62857143 | 0.66666667 | 0.4 | 0.85714286 | 0.65833333 |
| T2w_Flair_Enhancing_RFE   | HGB     | 0.62857143 | 0.66666667 | 0.4 | 0.85714286 | 0.65833333 |
| T2w_Flair_Whole_Kbest     | GNB     | 0.62857143 | 0.66666667 | 0.4 | 0.85714286 | 0.65833333 |
| T2w_Flair_Whole_RFE       | KN      | 0.62857143 | 0.66666667 | 0.4 | 0.85714286 | 0.65833333 |
| T2w_Flair_Whole_RFE       | QDA     | 0.62857143 | 0.66666667 | 0.4 | 0.85714286 | 0.65833333 |
| T1w_CE_Core_mRmR          | NC      | 0.61428571 | 0.58333333 | 0.8 | 0.42857143 | 0.69166667 |
| T1w_CE_Core_mRmR          | RF      | 0.61428571 | 0.58333333 | 0.8 | 0.42857143 | 0.69166667 |
| T1w_CE_Necrosis_Kbest     | Bagging | 0.61428571 | 0.58333333 | 0.8 | 0.42857143 | 0.69166667 |
| T1w_CE_Necrosis_Kbest     | GNB     | 0.61428571 | 0.58333333 | 0.8 | 0.42857143 | 0.69166667 |
| T1w_CE_Necrosis_RFE       | RF      | 0.61428571 | 0.58333333 | 0.8 | 0.42857143 | 0.69166667 |
| T2w_Flair_Enhancing_Kbest | NC      | 0.61428571 | 0.58333333 | 0.8 | 0.42857143 | 0.69166667 |
| T1w_CE_Edema_mRmR         | GNB     | 0.6        | 0.66666667 | 0.2 | 1          | 0.76666667 |
| T1w_CE_Edema_mRmR         | NC      | 0.6        | 0.66666667 | 0.2 | 1          | 0.76666667 |
| T1w_CE_Edema_mRmR         | RF      | 0.6        | 0.66666667 | 0.2 | 1          | 0.76666667 |
| T1w_CE_Edema_RFE          | GB      | 0.6        | 0.66666667 | 0.2 | 1          | 0.76666667 |
| T1w_CE_Enhancing_Kbest    | NC      | 0.6        | 0.66666667 | 0.2 | 1          | 0.76666667 |
| T1w_CE_Enhancing_mRmR     | Bagging | 0.6        | 0.66666667 | 0.2 | 1          | 0.76666667 |
| T1w_CE_Enhancing_mRmR     | QDA     | 0.6        | 0.66666667 | 0.2 | 1          | 0.76666667 |
| T1w_CE_Enhancing_RFE      | BNB     | 0.6        | 0.66666667 | 0.2 | 1          | 0.76666667 |
| T1w_CE_Necrosis_RFE       | LR      | 0.6        | 0.66666667 | 0.2 | 1          | 0.76666667 |
| T1w_CE_Whole_mRmR         | GNB     | 0.6        | 0.66666667 | 0.2 | 1          | 0.76666667 |
| T1w_CE_Whole_mRmR         | LR      | 0.6        | 0.66666667 | 0.2 | 1          | 0.76666667 |
| T2w_Flair_Core_mRmR       | GNB     | 0.6        | 0.66666667 | 0.2 | 1          | 0.76666667 |
| T2w_Flair_Core_mRmR       | LR      | 0.6        | 0.66666667 | 0.2 | 1          | 0.76666667 |
| T2w_Flair_Edema_Kbest     | BNB     | 0.6        | 0.66666667 | 0.2 | 1          | 0.76666667 |
| T2w_Flair_Edema_mRmR      | Bagging | 0.6        | 0.66666667 | 0.2 | 1          | 0.76666667 |
| T2w_Flair_Edema_mRmR      | DT      | 0.6        | 0.66666667 | 0.2 | 1          | 0.76666667 |
| T2w_Flair_Edema_mRmR      | GB      | 0.6        | 0.66666667 | 0.2 | 1          | 0.76666667 |
| T2w_Flair_Edema_mRmR      | KN      | 0.6        | 0.66666667 | 0.2 | 1          | 0.76666667 |
| T2w_Flair_Edema_RFE       | MLPC    | 0.6        | 0.66666667 | 0.2 | 1          | 0.76666667 |
| T2w_Flair_Edema_RFE       | RF      | 0.6        | 0.66666667 | 0.2 | 1          | 0.76666667 |
| T2w_Flair_Enhancing_RFE   | SVC     | 0.6        | 0.66666667 | 0.2 | 1          | 0.76666667 |

|                           |         |            |            |     |            |            |
|---------------------------|---------|------------|------------|-----|------------|------------|
| T2w_Flair_Whole_Kbest     | BNB     | 0.6        | 0.66666667 | 0.2 | 1          | 0.76666667 |
| T2w_Flair_Whole_mRmR      | BNB     | 0.6        | 0.66666667 | 0.2 | 1          | 0.76666667 |
| T1w_CE_Necrosis_Kbest     | GB      | 0.58571429 | 0.58333333 | 0.6 | 0.57142857 | 0.63333333 |
| T1w_CE_Necrosis_Kbest     | HGB     | 0.58571429 | 0.58333333 | 0.6 | 0.57142857 | 0.63333333 |
| T1w_CE_Necrosis_RFE       | Bagging | 0.58571429 | 0.58333333 | 0.6 | 0.57142857 | 0.63333333 |
| T2w_Flair_Core_Kbest      | Bagging | 0.58571429 | 0.58333333 | 0.6 | 0.57142857 | 0.63333333 |
| T2w_Flair_Core_Kbest      | DT      | 0.58571429 | 0.58333333 | 0.6 | 0.57142857 | 0.63333333 |
| T2w_Flair_Core_Kbest      | RF      | 0.58571429 | 0.58333333 | 0.6 | 0.57142857 | 0.63333333 |
| T2w_Flair_Enhancing_Kbest | AB      | 0.58571429 | 0.58333333 | 0.6 | 0.57142857 | 0.63333333 |
| T2w_Flair_Enhancing_mRmR  | DT      | 0.58571429 | 0.58333333 | 0.6 | 0.57142857 | 0.63333333 |
| T2w_Flair_Enhancing_mRmR  | Bagging | 0.58571429 | 0.58333333 | 0.6 | 0.57142857 | 0.63333333 |
| T2w_Flair_Enhancing_mRmR  | ET      | 0.58571429 | 0.58333333 | 0.6 | 0.57142857 | 0.63333333 |
| T2w_Flair_Enhancing_mRmR  | RF      | 0.58571429 | 0.58333333 | 0.6 | 0.57142857 | 0.63333333 |
| T2w_Flair_Enhancing_RFE   | DT      | 0.58571429 | 0.58333333 | 0.6 | 0.57142857 | 0.63333333 |
| T2w_Flair_Whole_mRmR      | HGB     | 0.58571429 | 0.58333333 | 0.6 | 0.57142857 | 0.63333333 |
| T1w_CE_Core_mRmR          | DT      | 0.57142857 | 0.5        | 1   | 0.14285714 | 0.72727273 |
| T1w_CE_Edema_Kbest        | GB      | 0.55714286 | 0.58333333 | 0.4 | 0.71428571 | 0.575      |
| T2w_Flair_Core_Kbest      | HGB     | 0.55714286 | 0.58333333 | 0.4 | 0.71428571 | 0.575      |
| T2w_Flair_Core_mRmR       | DT      | 0.55714286 | 0.58333333 | 0.4 | 0.71428571 | 0.575      |
| T2w_Flair_Core_mRmR       | NC      | 0.55714286 | 0.58333333 | 0.4 | 0.71428571 | 0.575      |
| T2w_Flair_Core_mRmR       | PA      | 0.55714286 | 0.58333333 | 0.4 | 0.71428571 | 0.575      |
| T2w_Flair_Whole_Kbest     | LDA     | 0.55714286 | 0.58333333 | 0.4 | 0.71428571 | 0.575      |
| T2w_Flair_Whole_Kbest     | LR      | 0.55714286 | 0.58333333 | 0.4 | 0.71428571 | 0.575      |
| T2w_Flair_Whole_Kbest     | MLPC    | 0.55714286 | 0.58333333 | 0.4 | 0.71428571 | 0.575      |
| T2w_Flair_Whole_Kbest     | NC      | 0.55714286 | 0.58333333 | 0.4 | 0.71428571 | 0.575      |
| T2w_Flair_Whole_Kbest     | Ridge   | 0.55714286 | 0.58333333 | 0.4 | 0.71428571 | 0.575      |
| T2w_Flair_Whole_mRmR      | QDA     | 0.55714286 | 0.58333333 | 0.4 | 0.71428571 | 0.575      |
| T1w_CE_Edema_mRmR         | GB      | 0.52857143 | 0.58333333 | 0.2 | 0.85714286 | 0.51666667 |
| T1w_CE_Edema_RFE          | KN      | 0.52857143 | 0.58333333 | 0.2 | 0.85714286 | 0.51666667 |
| T1w_CE_Enhancing_Kbest    | AB      | 0.52857143 | 0.58333333 | 0.2 | 0.85714286 | 0.51666667 |
| T1w_CE_Necrosis_RFE       | Ridge   | 0.52857143 | 0.58333333 | 0.2 | 0.85714286 | 0.51666667 |
| T1w_CE_Whole_mRmR         | KN      | 0.52857143 | 0.58333333 | 0.2 | 0.85714286 | 0.51666667 |
| T2w_Flair_Core_Kbest      | AB      | 0.52857143 | 0.58333333 | 0.2 | 0.85714286 | 0.51666667 |
| T2w_Flair_Edema_Kbest     | GB      | 0.52857143 | 0.58333333 | 0.2 | 0.85714286 | 0.51666667 |
| T2w_Flair_Edema_Kbest     | QDA     | 0.52857143 | 0.58333333 | 0.2 | 0.85714286 | 0.51666667 |
| T2w_Flair_Edema_Kbest     | RF      | 0.52857143 | 0.58333333 | 0.2 | 0.85714286 | 0.51666667 |
| T2w_Flair_Edema_mRmR      | QDA     | 0.52857143 | 0.58333333 | 0.2 | 0.85714286 | 0.51666667 |
| T2w_Flair_Edema_RFE       | Bagging | 0.52857143 | 0.58333333 | 0.2 | 0.85714286 | 0.51666667 |
| T2w_Flair_Edema_RFE       | BNB     | 0.52857143 | 0.58333333 | 0.2 | 0.85714286 | 0.51666667 |
| T2w_Flair_Edema_RFE       | KN      | 0.52857143 | 0.58333333 | 0.2 | 0.85714286 | 0.51666667 |



|                           |       |            |            |     |            |            |
|---------------------------|-------|------------|------------|-----|------------|------------|
| T2w_Flair_Enhancing_Kbest | LDA   | 0.52857143 | 0.58333333 | 0.2 | 0.85714286 | 0.51666667 |
| T2w_Flair_Enhancing_mRmR  | NC    | 0.52857143 | 0.58333333 | 0.2 | 0.85714286 | 0.51666667 |
| T2w_Flair_Enhancing_mRmR  | QDA   | 0.52857143 | 0.58333333 | 0.2 | 0.85714286 | 0.51666667 |
| T2w_Flair_Enhancing_mRmR  | NC    | 0.52857143 | 0.58333333 | 0.2 | 0.85714286 | 0.51666667 |
| T2w_Flair_Enhancing_RFE   | AB    | 0.52857143 | 0.58333333 | 0.2 | 0.85714286 | 0.51666667 |
| T2w_Flair_Enhancing_RFE   | QDA   | 0.52857143 | 0.58333333 | 0.2 | 0.85714286 | 0.51666667 |
| T1w_CE_Edema_Kbest        | HGB   | 0.51428571 | 0.5        | 0.6 | 0.42857143 | 0.59761905 |
| T1w_CE_Edema_Kbest        | KN    | 0.51428571 | 0.5        | 0.6 | 0.42857143 | 0.59761905 |
| T1w_CE_Necrosis_RFE       | DT    | 0.51428571 | 0.5        | 0.6 | 0.42857143 | 0.59761905 |
| T1w_CE_Necrosis_RFE       | GB    | 0.51428571 | 0.5        | 0.6 | 0.42857143 | 0.59761905 |
| T1w_CE_Core_Kbest         | BNB   | 0.5        | 0.58333333 | 0   | 1          | 0.70833333 |
| T1w_CE_Core_Kbest         | PA    | 0.5        | 0.58333333 | 0   | 1          | 0.70833333 |
| T1w_CE_Core_mRmR          | BNB   | 0.5        | 0.58333333 | 0   | 1          | 0.70833333 |
| T1w_CE_Core_mRmR          | PA    | 0.5        | 0.58333333 | 0   | 1          | 0.70833333 |
| T1w_CE_Core_RFE           | BNB   | 0.5        | 0.58333333 | 0   | 1          | 0.70833333 |
| T1w_CE_Core_RFE           | LDA   | 0.5        | 0.58333333 | 0   | 1          | 0.70833333 |
| T1w_CE_Core_RFE           | LR    | 0.5        | 0.58333333 | 0   | 1          | 0.70833333 |
| T1w_CE_Core_RFE           | MLPC  | 0.5        | 0.58333333 | 0   | 1          | 0.70833333 |
| T1w_CE_Core_RFE           | NC    | 0.5        | 0.58333333 | 0   | 1          | 0.70833333 |
| T1w_CE_Core_RFE           | Ridge | 0.5        | 0.58333333 | 0   | 1          | 0.70833333 |
| T1w_CE_Edema_Kbest        | BNB   | 0.5        | 0.58333333 | 0   | 1          | 0.70833333 |
| T1w_CE_Edema_mRmR         | BNB   | 0.5        | 0.58333333 | 0   | 1          | 0.70833333 |
| T1w_CE_Edema_mRmR         | LDA   | 0.5        | 0.58333333 | 0   | 1          | 0.70833333 |
| T1w_CE_Edema_mRmR         | LR    | 0.5        | 0.58333333 | 0   | 1          | 0.70833333 |
| T1w_CE_Edema_mRmR         | PA    | 0.5        | 0.41666667 | 1   | 0          | 0.70833333 |
| T1w_CE_Edema_mRmR         | Ridge | 0.5        | 0.58333333 | 0   | 1          | 0.70833333 |
| T1w_CE_Edema_RFE          | AB    | 0.5        | 0.58333333 | 0   | 1          | 0.70833333 |
| T1w_CE_Edema_RFE          | BNB   | 0.5        | 0.58333333 | 0   | 1          | 0.70833333 |
| T1w_CE_Edema_RFE          | GNB   | 0.5        | 0.58333333 | 0   | 1          | 0.70833333 |
| T1w_CE_Edema_RFE          | LDA   | 0.5        | 0.58333333 | 0   | 1          | 0.70833333 |
| T1w_CE_Edema_RFE          | LR    | 0.5        | 0.58333333 | 0   | 1          | 0.70833333 |
| T1w_CE_Edema_RFE          | MLPC  | 0.5        | 0.58333333 | 0   | 1          | 0.70833333 |
| T1w_CE_Edema_RFE          | PA    | 0.5        | 0.58333333 | 0   | 1          | 0.70833333 |
| T1w_CE_Edema_RFE          | QDA   | 0.5        | 0.58333333 | 0   | 1          | 0.70833333 |
| T1w_CE_Edema_RFE          | Ridge | 0.5        | 0.58333333 | 0   | 1          | 0.70833333 |
| T1w_CE_Edema_RFE          | SVC   | 0.5        | 0.58333333 | 0   | 1          | 0.70833333 |
| T1w_CE_Enhancing_Kbest    | BNB   | 0.5        | 0.58333333 | 0   | 1          | 0.70833333 |
| T1w_CE_Enhancing_Kbest    | LDA   | 0.5        | 0.58333333 | 0   | 1          | 0.70833333 |
| T1w_CE_Enhancing_Kbest    | LR    | 0.5        | 0.58333333 | 0   | 1          | 0.70833333 |
| T1w_CE_Enhancing_Kbest    | MLPC  | 0.5        | 0.58333333 | 0   | 1          | 0.70833333 |

|                        |       |     |            |   |   |            |
|------------------------|-------|-----|------------|---|---|------------|
| T1w_CE_Enhancing_Kbest | Ridge | 0.5 | 0.58333333 | 0 | 1 | 0.70833333 |
| T1w_CE_Enhancing_Kbest | SVC   | 0.5 | 0.58333333 | 0 | 1 | 0.70833333 |
| T1w_CE_Enhancing_mRmR  | BNB   | 0.5 | 0.58333333 | 0 | 1 | 0.70833333 |
| T1w_CE_Enhancing_mRmR  | GNB   | 0.5 | 0.58333333 | 0 | 1 | 0.70833333 |
| T1w_CE_Enhancing_mRmR  | LDA   | 0.5 | 0.58333333 | 0 | 1 | 0.70833333 |
| T1w_CE_Enhancing_mRmR  | LR    | 0.5 | 0.58333333 | 0 | 1 | 0.70833333 |
| T1w_CE_Enhancing_mRmR  | MLPC  | 0.5 | 0.58333333 | 0 | 1 | 0.70833333 |
| T1w_CE_Enhancing_mRmR  | Ridge | 0.5 | 0.58333333 | 0 | 1 | 0.70833333 |
| T1w_CE_Enhancing_RFE   | GNB   | 0.5 | 0.58333333 | 0 | 1 | 0.70833333 |
| T1w_CE_Enhancing_RFE   | LDA   | 0.5 | 0.58333333 | 0 | 1 | 0.70833333 |
| T1w_CE_Enhancing_RFE   | LR    | 0.5 | 0.58333333 | 0 | 1 | 0.70833333 |
| T1w_CE_Enhancing_RFE   | NC    | 0.5 | 0.58333333 | 0 | 1 | 0.70833333 |
| T1w_CE_Enhancing_RFE   | PA    | 0.5 | 0.58333333 | 0 | 1 | 0.70833333 |
| T1w_CE_Enhancing_RFE   | Ridge | 0.5 | 0.58333333 | 0 | 1 | 0.70833333 |
| T1w_CE_Necrosis_Kbest  | BNB   | 0.5 | 0.58333333 | 0 | 1 | 0.70833333 |
| T1w_CE_Necrosis_Kbest  | PA    | 0.5 | 0.41666667 | 1 | 0 | 0.70833333 |
| T1w_CE_Necrosis_mRmR   | BNB   | 0.5 | 0.58333333 | 0 | 1 | 0.70833333 |
| T1w_CE_Necrosis_mRmR   | PA    | 0.5 | 0.58333333 | 0 | 1 | 0.70833333 |
| T1w_CE_Necrosis_RFE    | BNB   | 0.5 | 0.58333333 | 0 | 1 | 0.70833333 |
| T1w_CE_Whole_Kbest     | BNB   | 0.5 | 0.58333333 | 0 | 1 | 0.70833333 |
| T1w_CE_Whole_mRmR      | BNB   | 0.5 | 0.58333333 | 0 | 1 | 0.70833333 |
| T1w_CE_Whole_RFE       | BNB   | 0.5 | 0.58333333 | 0 | 1 | 0.70833333 |
| T1w_CE_Whole_RFE       | LDA   | 0.5 | 0.58333333 | 0 | 1 | 0.70833333 |
| T1w_CE_Whole_RFE       | LR    | 0.5 | 0.58333333 | 0 | 1 | 0.70833333 |
| T1w_CE_Whole_RFE       | PA    | 0.5 | 0.41666667 | 1 | 0 | 0.70833333 |
| T1w_CE_Whole_RFE       | Ridge | 0.5 | 0.58333333 | 0 | 1 | 0.70833333 |
| T2w_Flair_Core_Kbest   | BNB   | 0.5 | 0.58333333 | 0 | 1 | 0.70833333 |
| T2w_Flair_Core_Kbest   | GNB   | 0.5 | 0.58333333 | 0 | 1 | 0.70833333 |
| T2w_Flair_Core_Kbest   | LDA   | 0.5 | 0.58333333 | 0 | 1 | 0.70833333 |
| T2w_Flair_Core_Kbest   | LR    | 0.5 | 0.58333333 | 0 | 1 | 0.70833333 |
| T2w_Flair_Core_Kbest   | MLPC  | 0.5 | 0.58333333 | 0 | 1 | 0.70833333 |
| T2w_Flair_Core_Kbest   | PA    | 0.5 | 0.41666667 | 1 | 0 | 0.70833333 |
| T2w_Flair_Core_Kbest   | QDA   | 0.5 | 0.58333333 | 0 | 1 | 0.70833333 |
| T2w_Flair_Core_Kbest   | Ridge | 0.5 | 0.58333333 | 0 | 1 | 0.70833333 |
| T2w_Flair_Core_Kbest   | SVC   | 0.5 | 0.58333333 | 0 | 1 | 0.70833333 |
| T2w_Flair_Core_mRmR    | BNB   | 0.5 | 0.58333333 | 0 | 1 | 0.70833333 |
| T2w_Flair_Core_RFE     | BNB   | 0.5 | 0.58333333 | 0 | 1 | 0.70833333 |
| T2w_Flair_Core_RFE     | NC    | 0.5 | 0.41666667 | 1 | 0 | 0.70833333 |
| T2w_Flair_Core_RFE     | PA    | 0.5 | 0.58333333 | 0 | 1 | 0.70833333 |
| T2w_Flair_Edema_Kbest  | LDA   | 0.5 | 0.58333333 | 0 | 1 | 0.70833333 |

|                           |       |     |            |   |   |            |
|---------------------------|-------|-----|------------|---|---|------------|
| T2w_Flair_Edema_Kbest     | LR    | 0.5 | 0.58333333 | 0 | 1 | 0.70833333 |
| T2w_Flair_Edema_Kbest     | MLPC  | 0.5 | 0.58333333 | 0 | 1 | 0.70833333 |
| T2w_Flair_Edema_Kbest     | NC    | 0.5 | 0.58333333 | 0 | 1 | 0.70833333 |
| T2w_Flair_Edema_Kbest     | Ridge | 0.5 | 0.58333333 | 0 | 1 | 0.70833333 |
| T2w_Flair_Edema_Kbest     | SVC   | 0.5 | 0.58333333 | 0 | 1 | 0.70833333 |
| T2w_Flair_Edema_mRmR      | BNB   | 0.5 | 0.58333333 | 0 | 1 | 0.70833333 |
| T2w_Flair_Edema_mRmR      | LDA   | 0.5 | 0.58333333 | 0 | 1 | 0.70833333 |
| T2w_Flair_Edema_mRmR      | LR    | 0.5 | 0.58333333 | 0 | 1 | 0.70833333 |
| T2w_Flair_Edema_mRmR      | NC    | 0.5 | 0.58333333 | 0 | 1 | 0.70833333 |
| T2w_Flair_Edema_mRmR      | Ridge | 0.5 | 0.58333333 | 0 | 1 | 0.70833333 |
| T2w_Flair_Edema_mRmR      | SVC   | 0.5 | 0.58333333 | 0 | 1 | 0.70833333 |
| T2w_Flair_Edema_RFE       | LDA   | 0.5 | 0.58333333 | 0 | 1 | 0.70833333 |
| T2w_Flair_Edema_RFE       | LR    | 0.5 | 0.58333333 | 0 | 1 | 0.70833333 |
| T2w_Flair_Edema_RFE       | NC    | 0.5 | 0.58333333 | 0 | 1 | 0.70833333 |
| T2w_Flair_Edema_RFE       | PA    | 0.5 | 0.58333333 | 0 | 1 | 0.70833333 |
| T2w_Flair_Edema_RFE       | Ridge | 0.5 | 0.58333333 | 0 | 1 | 0.70833333 |
| T2w_Flair_Edema_RFE       | SVC   | 0.5 | 0.58333333 | 0 | 1 | 0.70833333 |
| T2w_Flair_Enhancing_Kbest | BNB   | 0.5 | 0.58333333 | 0 | 1 | 0.70833333 |
| T2w_Flair_Enhancing_Kbest | LR    | 0.5 | 0.58333333 | 0 | 1 | 0.70833333 |
| T2w_Flair_Enhancing_Kbest | PA    | 0.5 | 0.58333333 | 0 | 1 | 0.70833333 |
| T2w_Flair_Enhancing_Kbest | BNB   | 0.5 | 0.58333333 | 0 | 1 | 0.70833333 |
| T2w_Flair_Enhancing_Kbest | PA    | 0.5 | 0.58333333 | 0 | 1 | 0.70833333 |
| T2w_Flair_Enhancing_mRmR  | BNB   | 0.5 | 0.58333333 | 0 | 1 | 0.70833333 |
| T2w_Flair_Enhancing_mRmR  | GNB   | 0.5 | 0.58333333 | 0 | 1 | 0.70833333 |
| T2w_Flair_Enhancing_mRmR  | LDA   | 0.5 | 0.58333333 | 0 | 1 | 0.70833333 |
| T2w_Flair_Enhancing_mRmR  | LR    | 0.5 | 0.58333333 | 0 | 1 | 0.70833333 |
| T2w_Flair_Enhancing_mRmR  | PA    | 0.5 | 0.58333333 | 0 | 1 | 0.70833333 |
| T2w_Flair_Enhancing_mRmR  | Ridge | 0.5 | 0.58333333 | 0 | 1 | 0.70833333 |
| T2w_Flair_Enhancing_mRmR  | BNB   | 0.5 | 0.58333333 | 0 | 1 | 0.70833333 |
| T2w_Flair_Enhancing_mRmR  | PA    | 0.5 | 0.41666667 | 1 | 0 | 0.70833333 |
| T2w_Flair_Enhancing_RFE   | BNB   | 0.5 | 0.58333333 | 0 | 1 | 0.70833333 |
| T2w_Flair_Enhancing_RFE   | LDA   | 0.5 | 0.58333333 | 0 | 1 | 0.70833333 |
| T2w_Flair_Enhancing_RFE   | LR    | 0.5 | 0.58333333 | 0 | 1 | 0.70833333 |
| T2w_Flair_Enhancing_RFE   | MLPC  | 0.5 | 0.58333333 | 0 | 1 | 0.70833333 |
| T2w_Flair_Enhancing_RFE   | PA    | 0.5 | 0.41666667 | 1 | 0 | 0.70833333 |
| T2w_Flair_Enhancing_RFE   | Ridge | 0.5 | 0.58333333 | 0 | 1 | 0.70833333 |
| T2w_Flair_Enhancing_RFE   | BNB   | 0.5 | 0.58333333 | 0 | 1 | 0.70833333 |
| T2w_Flair_Enhancing_RFE   | GNB   | 0.5 | 0.58333333 | 0 | 1 | 0.70833333 |
| T2w_Flair_Enhancing_RFE   | LDA   | 0.5 | 0.58333333 | 0 | 1 | 0.70833333 |
| T2w_Flair_Enhancing_RFE   | LR    | 0.5 | 0.58333333 | 0 | 1 | 0.70833333 |

|                           |         |            |            |     |            |            |
|---------------------------|---------|------------|------------|-----|------------|------------|
| T2w_Flair_Enhancing_RFE   | MLPC    | 0.5        | 0.58333333 | 0   | 1          | 0.70833333 |
| T2w_Flair_Enhancing_RFE   | Ridge   | 0.5        | 0.58333333 | 0   | 1          | 0.70833333 |
| T2w_Flair_Whole_mRmR      | PA      | 0.5        | 0.58333333 | 0   | 1          | 0.70833333 |
| T2w_Flair_Whole_RFE       | BNB     | 0.5        | 0.41666667 | 1   | 0          | 0.70833333 |
| T1w_CE_Necrosis_RFE       | KN      | 0.48571429 | 0.5        | 0.4 | 0.57142857 | 0.525      |
| T2w_Flair_Edema_Kbest     | PA      | 0.47142857 | 0.41666667 | 0.8 | 0.14285714 | 0.64166667 |
| T1w_CE_Edema_RFE          | Bagging | 0.45714286 | 0.5        | 0.2 | 0.71428571 | 0.43333333 |
| T1w_CE_Edema_RFE          | DT      | 0.45714286 | 0.5        | 0.2 | 0.71428571 | 0.43333333 |
| T1w_CE_Edema_RFE          | ET      | 0.45714286 | 0.5        | 0.2 | 0.71428571 | 0.43333333 |
| T1w_CE_Edema_RFE          | RF      | 0.45714286 | 0.5        | 0.2 | 0.71428571 | 0.43333333 |
| T1w_CE_Necrosis_RFE       | ET      | 0.45714286 | 0.5        | 0.2 | 0.71428571 | 0.43333333 |
| T1w_CE_Necrosis_RFE       | LDA     | 0.45714286 | 0.5        | 0.2 | 0.71428571 | 0.43333333 |
| T1w_CE_Necrosis_RFE       | PA      | 0.45714286 | 0.5        | 0.2 | 0.71428571 | 0.43333333 |
| T1w_CE_Edema_RFE          | HGB     | 0.42857143 | 0.5        | 0   | 0.85714286 | 0.20833333 |
| T1w_CE_Whole_RFE          | NC      | 0.42857143 | 0.5        | 0   | 0.85714286 | 0.20833333 |
| T2w_Flair_Edema_Kbest     | ET      | 0.42857143 | 0.5        | 0   | 0.85714286 | 0.20833333 |
| T2w_Flair_Edema_Kbest     | KN      | 0.42857143 | 0.5        | 0   | 0.85714286 | 0.20833333 |
| T2w_Flair_Edema_RFE       | GNB     | 0.42857143 | 0.5        | 0   | 0.85714286 | 0.20833333 |
| T2w_Flair_Edema_RFE       | QDA     | 0.42857143 | 0.5        | 0   | 0.85714286 | 0.20833333 |
| T2w_Flair_Enhancing_Kbest | Ridge   | 0.42857143 | 0.5        | 0   | 0.85714286 | 0.20833333 |
| T2w_Flair_Enhancing_Kbest | LDA     | 0.42857143 | 0.5        | 0   | 0.85714286 | 0.20833333 |
| T2w_Flair_Enhancing_Kbest | LR      | 0.42857143 | 0.5        | 0   | 0.85714286 | 0.20833333 |
| T2w_Flair_Enhancing_Kbest | Ridge   | 0.42857143 | 0.5        | 0   | 0.85714286 | 0.20833333 |
| T2w_Flair_Enhancing_mRmR  | GNB     | 0.42857143 | 0.5        | 0   | 0.85714286 | 0.20833333 |
| T2w_Flair_Enhancing_mRmR  | LDA     | 0.42857143 | 0.5        | 0   | 0.85714286 | 0.20833333 |
| T2w_Flair_Enhancing_mRmR  | LR      | 0.42857143 | 0.5        | 0   | 0.85714286 | 0.20833333 |
| T2w_Flair_Enhancing_mRmR  | MLPC    | 0.42857143 | 0.5        | 0   | 0.85714286 | 0.20833333 |
| T2w_Flair_Enhancing_mRmR  | QDA     | 0.42857143 | 0.5        | 0   | 0.85714286 | 0.20833333 |
| T2w_Flair_Enhancing_mRmR  | Ridge   | 0.42857143 | 0.5        | 0   | 0.85714286 | 0.20833333 |
| T2w_Flair_Enhancing_RFE   | GNB     | 0.42857143 | 0.5        | 0   | 0.85714286 | 0.20833333 |
| T2w_Flair_Enhancing_RFE   | NC      | 0.42857143 | 0.5        | 0   | 0.85714286 | 0.20833333 |
| T2w_Flair_Enhancing_RFE   | QDA     | 0.42857143 | 0.5        | 0   | 0.85714286 | 0.20833333 |
| T2w_Flair_Whole_RFE       | LDA     | 0.42857143 | 0.5        | 0   | 0.85714286 | 0.20833333 |
| T2w_Flair_Whole_RFE       | LR      | 0.42857143 | 0.5        | 0   | 0.85714286 | 0.20833333 |
| T2w_Flair_Whole_RFE       | NC      | 0.42857143 | 0.5        | 0   | 0.85714286 | 0.20833333 |
| T2w_Flair_Whole_RFE       | Ridge   | 0.42857143 | 0.5        | 0   | 0.85714286 | 0.20833333 |
| T1w_CE_Necrosis_mRmR      | DT      | 0.41428571 | 0.41666667 | 0.4 | 0.42857143 | 0.49166667 |
| T1w_CE_Necrosis_RFE       | AB      | 0.41428571 | 0.41666667 | 0.4 | 0.42857143 | 0.49166667 |
| T1w_CE_Whole_mRmR         | AB      | 0.41428571 | 0.41666667 | 0.4 | 0.42857143 | 0.49166667 |
| T1w_CE_Edema_Kbest        | Bagging | 0.31428571 | 0.33333333 | 0.2 | 0.42857143 | 0.36666667 |



|                     |     |            |            |     |            |            |
|---------------------|-----|------------|------------|-----|------------|------------|
| T1w_CE_Necrosis_RFE | GNB | 0.3        | 0.25       | 0.6 | 0          | 0.53333333 |
| T1w_CE_Necrosis_RFE | NC  | 0.27142857 | 0.25       | 0.4 | 0.14285714 | 0.45       |
| T1w_CE_Edema_Kbest  | DT  | 0.17142857 | 0.16666667 | 0.2 | 0.14285714 | 0.33809524 |
| T1w_CE_Edema_Kbest  | ET  | 0.17142857 | 0.16666667 | 0.2 | 0.14285714 | 0.33809524 |
| T1w_CE_Edema_Kbest  | RF  | 0.17142857 | 0.16666667 | 0.2 | 0.14285714 | 0.33809524 |

Table S3. The complete result of multi-machine learning algorithms, feature selection, and multi-segmentation approaches in discriminating IDH-mutant grade-4 astrocytomas from IDH wild-type GBMs of original data.

| Approach             | ML      | AUC        | ACC        | SEN | SPE        | PR_AUC     |
|----------------------|---------|------------|------------|-----|------------|------------|
| Or_T1w_CE_Core_Kbest | AB      | 0.92857143 | 0.91666667 | 1   | 0.85714286 | 0.91666667 |
| Or_T1w_CE_Core_Kbest | KN      | 0.92857143 | 0.91666667 | 1   | 0.85714286 | 0.91666667 |
| Or_T1w_CE_Core_RFE   | LR      | 0.92857143 | 0.91666667 | 1   | 0.85714286 | 0.91666667 |
| Or_T1w_CE_Core_RFE   | MLPC    | 0.92857143 | 0.91666667 | 1   | 0.85714286 | 0.91666667 |
| Or_T1w_CE_Core_RFE   | SVC     | 0.92857143 | 0.91666667 | 1   | 0.85714286 | 0.91666667 |
| Or_T1w_CE_Core_RFE   | HGB     | 0.92857143 | 0.91666667 | 1   | 0.85714286 | 0.91666667 |
| Or_T1w_CE_Core_RFE   | HGB     | 0.92857143 | 0.91666667 | 1   | 0.85714286 | 0.91666667 |
| Or_T1w_CE_Core_RFE   | LDA     | 0.92857143 | 0.91666667 | 1   | 0.85714286 | 0.91666667 |
| Or_T1w_CE_Core_RFE   | MLPC    | 0.92857143 | 0.91666667 | 1   | 0.85714286 | 0.91666667 |
| Or_T1w_CE_Core_RFE   | DT      | 0.92857143 | 0.91666667 | 1   | 0.85714286 | 0.91666667 |
| Or_T1w_CE_Core_RFE   | DT      | 0.92857143 | 0.91666667 | 1   | 0.85714286 | 0.91666667 |
| Or_T1w_CE_Core_RFE   | GB      | 0.92857143 | 0.91666667 | 1   | 0.85714286 | 0.91666667 |
| Or_T1w_CE_Core_RFE   | RF      | 0.92857143 | 0.91666667 | 1   | 0.85714286 | 0.91666667 |
| Or_T1w_CE_Core_RFE   | RF      | 0.92857143 | 0.91666667 | 1   | 0.85714286 | 0.91666667 |
| Or_T1w_CE_Core_RFE   | Bagging | 0.92857143 | 0.91666667 | 1   | 0.85714286 | 0.91666667 |
| Or_T1w_CE_Core_RFE   | ET      | 0.92857143 | 0.91666667 | 1   | 0.85714286 | 0.91666667 |
| Or_T1w_CE_Core_RFE   | GNB     | 0.92857143 | 0.91666667 | 1   | 0.85714286 | 0.91666667 |
| Or_T1w_CE_Core_RFE   | GB      | 0.92857143 | 0.91666667 | 1   | 0.85714286 | 0.91666667 |
| Or_T1w_CE_Core_RFE   | KN      | 0.92857143 | 0.91666667 | 1   | 0.85714286 | 0.91666667 |
| Or_T1w_CE_Core_RFE   | MLPC    | 0.92857143 | 0.91666667 | 1   | 0.85714286 | 0.91666667 |
| Or_T1w_CE_Core_mRmR  | NC      | 0.92857143 | 0.91666667 | 1   | 0.85714286 | 0.91666667 |
| Or_T1w_CE_Core_mRmR  | PA      | 0.92857143 | 0.91666667 | 1   | 0.85714286 | 0.91666667 |
| Or_T1w_CE_Core_mRmR  | QDA     | 0.92857143 | 0.91666667 | 1   | 0.85714286 | 0.91666667 |
| Or_T1w_CE_Core_mRmR  | RF      | 0.92857143 | 0.91666667 | 1   | 0.85714286 | 0.91666667 |
| Or_T1w_CE_Core_mRmR  | Bagging | 0.9        | 0.91666667 | 0.8 | 1          | 0.94166667 |
| Or_T1w_CE_Core_mRmR  | DT      | 0.9        | 0.91666667 | 0.8 | 1          | 0.94166667 |
| Or_T1w_CE_Core_mRmR  | GB      | 0.9        | 0.91666667 | 0.8 | 1          | 0.94166667 |
| Or_T1w_CE_Core_mRmR  | HGB     | 0.9        | 0.91666667 | 0.8 | 1          | 0.94166667 |
| Or_T1w_CE_Core_mRmR  | PA      | 0.9        | 0.91666667 | 0.8 | 1          | 0.94166667 |

|                       |         |     |            |     |   |            |
|-----------------------|---------|-----|------------|-----|---|------------|
| Or_T1w_CE_Core_mRmR   | Ridge   | 0.9 | 0.91666667 | 0.8 | 1 | 0.94166667 |
| Or_T1w_CE_Core_mRmR   | AB      | 0.9 | 0.91666667 | 0.8 | 1 | 0.94166667 |
| Or_T1w_CE_Core_mRmR   | Bagging | 0.9 | 0.91666667 | 0.8 | 1 | 0.94166667 |
| Or_T1w_CE_Core_mRmR   | DT      | 0.9 | 0.91666667 | 0.8 | 1 | 0.94166667 |
| Or_T1w_CE_Core_mRmR   | ET      | 0.9 | 0.91666667 | 0.8 | 1 | 0.94166667 |
| Or_T1w_CE_Core_mRmR   | GB      | 0.9 | 0.91666667 | 0.8 | 1 | 0.94166667 |
| Or_T1w_CE_Core_mRmR   | HGB     | 0.9 | 0.91666667 | 0.8 | 1 | 0.94166667 |
| Or_T1w_CE_Core_mRmR   | LDA     | 0.9 | 0.91666667 | 0.8 | 1 | 0.94166667 |
| Or_T1w_CE_Core_mRmR   | PA      | 0.9 | 0.91666667 | 0.8 | 1 | 0.94166667 |
| Or_T1w_CE_Edema_Kbest | RF      | 0.9 | 0.91666667 | 0.8 | 1 | 0.94166667 |
| Or_T1w_CE_Edema_Kbest | Ridge   | 0.9 | 0.91666667 | 0.8 | 1 | 0.94166667 |
| Or_T1w_CE_Edema_Kbest | AB      | 0.9 | 0.91666667 | 0.8 | 1 | 0.94166667 |
| Or_T1w_CE_Edema_Kbest | Bagging | 0.9 | 0.91666667 | 0.8 | 1 | 0.94166667 |
| Or_T1w_CE_Edema_Kbest | DT      | 0.9 | 0.91666667 | 0.8 | 1 | 0.94166667 |
| Or_T1w_CE_Edema_Kbest | GB      | 0.9 | 0.91666667 | 0.8 | 1 | 0.94166667 |
| Or_T1w_CE_Edema_Kbest | HGB     | 0.9 | 0.91666667 | 0.8 | 1 | 0.94166667 |
| Or_T1w_CE_Edema_Kbest | PA      | 0.9 | 0.91666667 | 0.8 | 1 | 0.94166667 |
| Or_T1w_CE_Edema_Kbest | Ridge   | 0.9 | 0.91666667 | 0.8 | 1 | 0.94166667 |
| Or_T1w_CE_Edema_Kbest | AB      | 0.9 | 0.91666667 | 0.8 | 1 | 0.94166667 |
| Or_T1w_CE_Edema_Kbest | Bagging | 0.9 | 0.91666667 | 0.8 | 1 | 0.94166667 |
| Or_T1w_CE_Edema_Kbest | DT      | 0.9 | 0.91666667 | 0.8 | 1 | 0.94166667 |
| Or_T1w_CE_Edema_Kbest | ET      | 0.9 | 0.91666667 | 0.8 | 1 | 0.94166667 |
| Or_T1w_CE_Edema_Kbest | GNB     | 0.9 | 0.91666667 | 0.8 | 1 | 0.94166667 |
| Or_T1w_CE_Edema_Kbest | GB      | 0.9 | 0.91666667 | 0.8 | 1 | 0.94166667 |
| Or_T1w_CE_Edema_Kbest | KN      | 0.9 | 0.91666667 | 0.8 | 1 | 0.94166667 |
| Or_T1w_CE_Edema_Kbest | LDA     | 0.9 | 0.91666667 | 0.8 | 1 | 0.94166667 |
| Or_T1w_CE_Edema_Kbest | MLPC    | 0.9 | 0.91666667 | 0.8 | 1 | 0.94166667 |
| Or_T1w_CE_Edema_RFE   | NC      | 0.9 | 0.91666667 | 0.8 | 1 | 0.94166667 |
| Or_T1w_CE_Edema_RFE   | PA      | 0.9 | 0.91666667 | 0.8 | 1 | 0.94166667 |
| Or_T1w_CE_Edema_RFE   | QDA     | 0.9 | 0.91666667 | 0.8 | 1 | 0.94166667 |
| Or_T1w_CE_Edema_RFE   | RF      | 0.9 | 0.91666667 | 0.8 | 1 | 0.94166667 |
| Or_T1w_CE_Edema_RFE   | Ridge   | 0.9 | 0.91666667 | 0.8 | 1 | 0.94166667 |
| Or_T1w_CE_Edema_RFE   | SVC     | 0.9 | 0.91666667 | 0.8 | 1 | 0.94166667 |
| Or_T1w_CE_Edema_RFE   | AB      | 0.9 | 0.91666667 | 0.8 | 1 | 0.94166667 |
| Or_T1w_CE_Edema_RFE   | Bagging | 0.9 | 0.91666667 | 0.8 | 1 | 0.94166667 |
| Or_T1w_CE_Edema_RFE   | DT      | 0.9 | 0.91666667 | 0.8 | 1 | 0.94166667 |
| Or_T1w_CE_Edema_RFE   | ET      | 0.9 | 0.91666667 | 0.8 | 1 | 0.94166667 |
| Or_T1w_CE_Edema_RFE   | GNB     | 0.9 | 0.91666667 | 0.8 | 1 | 0.94166667 |
| Or_T1w_CE_Edema_RFE   | GB      | 0.9 | 0.91666667 | 0.8 | 1 | 0.94166667 |
| Or_T1w_CE_Edema_RFE   | KN      | 0.9 | 0.91666667 | 0.8 | 1 | 0.94166667 |
| Or_T1w_CE_Edema_RFE   | LDA     | 0.9 | 0.91666667 | 0.8 | 1 | 0.94166667 |
| Or_T1w_CE_Edema_RFE   | MLPC    | 0.9 | 0.91666667 | 0.8 | 1 | 0.94166667 |
| Or_T1w_CE_Edema_RFE   | NC      | 0.9 | 0.91666667 | 0.8 | 1 | 0.94166667 |
| Or_T1w_CE_Edema_RFE   | PA      | 0.9 | 0.91666667 | 0.8 | 1 | 0.94166667 |

|                           |         |     |            |     |   |            |
|---------------------------|---------|-----|------------|-----|---|------------|
| Or_T1w_CE_Edema_RFE       | QDA     | 0.9 | 0.91666667 | 0.8 | 1 | 0.94166667 |
| Or_T1w_CE_Edema_mRmR      | RF      | 0.9 | 0.91666667 | 0.8 | 1 | 0.94166667 |
| Or_T1w_CE_Edema_mRmR      | Ridge   | 0.9 | 0.91666667 | 0.8 | 1 | 0.94166667 |
| Or_T1w_CE_Edema_mRmR      | SVC     | 0.9 | 0.91666667 | 0.8 | 1 | 0.94166667 |
| Or_T1w_CE_Edema_mRmR      | AB      | 0.9 | 0.91666667 | 0.8 | 1 | 0.94166667 |
| Or_T1w_CE_Edema_mRmR      | DT      | 0.9 | 0.91666667 | 0.8 | 1 | 0.94166667 |
| Or_T1w_CE_Edema_mRmR      | ET      | 0.9 | 0.91666667 | 0.8 | 1 | 0.94166667 |
| Or_T1w_CE_Edema_mRmR      | GNB     | 0.9 | 0.91666667 | 0.8 | 1 | 0.94166667 |
| Or_T1w_CE_Edema_mRmR      | GB      | 0.9 | 0.91666667 | 0.8 | 1 | 0.94166667 |
| Or_T1w_CE_Edema_mRmR      | MLPC    | 0.9 | 0.91666667 | 0.8 | 1 | 0.94166667 |
| Or_T1w_CE_Edema_mRmR      | NC      | 0.9 | 0.91666667 | 0.8 | 1 | 0.94166667 |
| Or_T1w_CE_Edema_mRmR      | PA      | 0.9 | 0.91666667 | 0.8 | 1 | 0.94166667 |
| Or_T1w_CE_Edema_mRmR      | QDA     | 0.9 | 0.91666667 | 0.8 | 1 | 0.94166667 |
| Or_T1w_CE_Edema_mRmR      | RF      | 0.9 | 0.91666667 | 0.8 | 1 | 0.94166667 |
| Or_T1w_CE_Edema_mRmR      | SVC     | 0.9 | 0.91666667 | 0.8 | 1 | 0.94166667 |
| Or_T1w_CE_Edema_mRmR      | DT      | 0.9 | 0.91666667 | 0.8 | 1 | 0.94166667 |
| Or_T1w_CE_Edema_mRmR      | ET      | 0.9 | 0.91666667 | 0.8 | 1 | 0.94166667 |
| Or_T1w_CE_Edema_mRmR      | LDA     | 0.9 | 0.91666667 | 0.8 | 1 | 0.94166667 |
| Or_T1w_CE_Edema_mRmR      | PA      | 0.9 | 0.91666667 | 0.8 | 1 | 0.94166667 |
| Or_T1w_CE_Enhancing_Kbest | QDA     | 0.9 | 0.91666667 | 0.8 | 1 | 0.94166667 |
| Or_T1w_CE_Enhancing_Kbest | RF      | 0.9 | 0.91666667 | 0.8 | 1 | 0.94166667 |
| Or_T1w_CE_Enhancing_Kbest | Ridge   | 0.9 | 0.91666667 | 0.8 | 1 | 0.94166667 |
| Or_T1w_CE_Enhancing_Kbest | AB      | 0.9 | 0.91666667 | 0.8 | 1 | 0.94166667 |
| Or_T1w_CE_Enhancing_Kbest | Bagging | 0.9 | 0.91666667 | 0.8 | 1 | 0.94166667 |
| Or_T1w_CE_Enhancing_Kbest | DT      | 0.9 | 0.91666667 | 0.8 | 1 | 0.94166667 |
| Or_T1w_CE_Enhancing_Kbest | ET      | 0.9 | 0.91666667 | 0.8 | 1 | 0.94166667 |
| Or_T1w_CE_Enhancing_Kbest | GNB     | 0.9 | 0.91666667 | 0.8 | 1 | 0.94166667 |
| Or_T1w_CE_Enhancing_Kbest | GB      | 0.9 | 0.91666667 | 0.8 | 1 | 0.94166667 |
| Or_T1w_CE_Enhancing_Kbest | KN      | 0.9 | 0.91666667 | 0.8 | 1 | 0.94166667 |
| Or_T1w_CE_Enhancing_Kbest | LDA     | 0.9 | 0.91666667 | 0.8 | 1 | 0.94166667 |
| Or_T1w_CE_Enhancing_Kbest | LR      | 0.9 | 0.91666667 | 0.8 | 1 | 0.94166667 |
| Or_T1w_CE_Enhancing_Kbest | MLPC    | 0.9 | 0.91666667 | 0.8 | 1 | 0.94166667 |
| Or_T1w_CE_Enhancing_Kbest | PA      | 0.9 | 0.91666667 | 0.8 | 1 | 0.94166667 |
| Or_T1w_CE_Enhancing_Kbest | QDA     | 0.9 | 0.91666667 | 0.8 | 1 | 0.94166667 |
| Or_T1w_CE_Enhancing_Kbest | RF      | 0.9 | 0.91666667 | 0.8 | 1 | 0.94166667 |
| Or_T1w_CE_Enhancing_Kbest | Ridge   | 0.9 | 0.91666667 | 0.8 | 1 | 0.94166667 |
| Or_T1w_CE_Enhancing_Kbest | SVC     | 0.9 | 0.91666667 | 0.8 | 1 | 0.94166667 |
| Or_T1w_CE_Enhancing_RFE   | AB      | 0.9 | 0.91666667 | 0.8 | 1 | 0.94166667 |
| Or_T1w_CE_Enhancing_RFE   | Bagging | 0.9 | 0.91666667 | 0.8 | 1 | 0.94166667 |
| Or_T1w_CE_Enhancing_RFE   | DT      | 0.9 | 0.91666667 | 0.8 | 1 | 0.94166667 |
| Or_T1w_CE_Enhancing_RFE   | ET      | 0.9 | 0.91666667 | 0.8 | 1 | 0.94166667 |
| Or_T1w_CE_Enhancing_RFE   | GNB     | 0.9 | 0.91666667 | 0.8 | 1 | 0.94166667 |
| Or_T1w_CE_Enhancing_RFE   | GB      | 0.9 | 0.91666667 | 0.8 | 1 | 0.94166667 |
| Or_T1w_CE_Enhancing_RFE   | KN      | 0.9 | 0.91666667 | 0.8 | 1 | 0.94166667 |

|                          |         |            |            |     |            |            |
|--------------------------|---------|------------|------------|-----|------------|------------|
| Or_T1w_CE_Enhancing_RFE  | MLPC    | 0.9        | 0.91666667 | 0.8 | 1          | 0.94166667 |
| Or_T1w_CE_Enhancing_RFE  | QDA     | 0.9        | 0.91666667 | 0.8 | 1          | 0.94166667 |
| Or_T1w_CE_Enhancing_RFE  | RF      | 0.9        | 0.91666667 | 0.8 | 1          | 0.94166667 |
| Or_T1w_CE_Enhancing_RFE  | Ridge   | 0.9        | 0.91666667 | 0.8 | 1          | 0.94166667 |
| Or_T1w_CE_Enhancing_RFE  | SVC     | 0.9        | 0.91666667 | 0.8 | 1          | 0.94166667 |
| Or_T1w_CE_Enhancing_RFE  | AB      | 0.9        | 0.91666667 | 0.8 | 1          | 0.94166667 |
| Or_T1w_CE_Enhancing_RFE  | DT      | 0.9        | 0.91666667 | 0.8 | 1          | 0.94166667 |
| Or_T1w_CE_Enhancing_RFE  | GB      | 0.9        | 0.91666667 | 0.8 | 1          | 0.94166667 |
| Or_T1w_CE_Enhancing_RFE  | HGB     | 0.9        | 0.91666667 | 0.8 | 1          | 0.94166667 |
| Or_T1w_CE_Enhancing_RFE  | AB      | 0.9        | 0.91666667 | 0.8 | 1          | 0.94166667 |
| Or_T1w_CE_Enhancing_RFE  | DT      | 0.9        | 0.91666667 | 0.8 | 1          | 0.94166667 |
| Or_T1w_CE_Enhancing_mRmR | GNB     | 0.9        | 0.91666667 | 0.8 | 1          | 0.94166667 |
| Or_T1w_CE_Enhancing_mRmR | LDA     | 0.9        | 0.91666667 | 0.8 | 1          | 0.94166667 |
| Or_T1w_CE_Enhancing_mRmR | MLPC    | 0.9        | 0.91666667 | 0.8 | 1          | 0.94166667 |
| Or_T1w_CE_Enhancing_mRmR | PA      | 0.9        | 0.91666667 | 0.8 | 1          | 0.94166667 |
| Or_T1w_CE_Enhancing_mRmR | QDA     | 0.9        | 0.91666667 | 0.8 | 1          | 0.94166667 |
| Or_T1w_CE_Enhancing_mRmR | SVC     | 0.9        | 0.91666667 | 0.8 | 1          | 0.94166667 |
| Or_T1w_CE_Enhancing_mRmR | HGB     | 0.9        | 0.91666667 | 0.8 | 1          | 0.94166667 |
| Or_T1w_CE_Enhancing_mRmR | PA      | 0.9        | 0.91666667 | 0.8 | 1          | 0.94166667 |
| Or_T1w_CE_Enhancing_mRmR | Bagging | 0.9        | 0.91666667 | 0.8 | 1          | 0.94166667 |
| Or_T1w_CE_Enhancing_mRmR | DT      | 0.9        | 0.91666667 | 0.8 | 1          | 0.94166667 |
| Or_T1w_CE_Enhancing_mRmR | GB      | 0.9        | 0.91666667 | 0.8 | 1          | 0.94166667 |
| Or_T1w_CE_Enhancing_mRmR | Bagging | 0.9        | 0.91666667 | 0.8 | 1          | 0.94166667 |
| Or_T1w_CE_Enhancing_mRmR | HGB     | 0.9        | 0.91666667 | 0.8 | 1          | 0.94166667 |
| Or_T1w_CE_Enhancing_mRmR | RF      | 0.9        | 0.91666667 | 0.8 | 1          | 0.94166667 |
| Or_T1w_CE_Enhancing_mRmR | DT      | 0.9        | 0.91666667 | 0.8 | 1          | 0.94166667 |
| Or_T1w_CE_Enhancing_mRmR | ET      | 0.9        | 0.91666667 | 0.8 | 1          | 0.94166667 |
| Or_T1w_CE_Enhancing_mRmR | LDA     | 0.9        | 0.91666667 | 0.8 | 1          | 0.94166667 |
| Or_T1w_CE_Enhancing_mRmR | RF      | 0.9        | 0.91666667 | 0.8 | 1          | 0.94166667 |
| Or_T1w_CE_Necrosis_Kbest | NC      | 0.85714286 | 0.83333333 | 1   | 0.71428571 | 0.85714286 |
| Or_T1w_CE_Necrosis_Kbest | QDA     | 0.85714286 | 0.83333333 | 1   | 0.71428571 | 0.85714286 |
| Or_T1w_CE_Necrosis_Kbest | PA      | 0.85714286 | 0.83333333 | 1   | 0.71428571 | 0.85714286 |
| Or_T1w_CE_Necrosis_Kbest | GB      | 0.85714286 | 0.83333333 | 1   | 0.71428571 | 0.85714286 |
| Or_T1w_CE_Necrosis_Kbest | KN      | 0.82857143 | 0.83333333 | 0.8 | 0.85714286 | 0.84166667 |
| Or_T1w_CE_Necrosis_Kbest | Bagging | 0.82857143 | 0.83333333 | 0.8 | 0.85714286 | 0.84166667 |
| Or_T1w_CE_Necrosis_Kbest | LDA     | 0.82857143 | 0.83333333 | 0.8 | 0.85714286 | 0.84166667 |
| Or_T1w_CE_Necrosis_Kbest | NC      | 0.82857143 | 0.83333333 | 0.8 | 0.85714286 | 0.84166667 |
| Or_T1w_CE_Necrosis_Kbest | GNB     | 0.82857143 | 0.83333333 | 0.8 | 0.85714286 | 0.84166667 |
| Or_T1w_CE_Necrosis_Kbest | KN      | 0.82857143 | 0.83333333 | 0.8 | 0.85714286 | 0.84166667 |
| Or_T1w_CE_Necrosis_Kbest | NC      | 0.82857143 | 0.83333333 | 0.8 | 0.85714286 | 0.84166667 |
| Or_T1w_CE_Necrosis_Kbest | PA      | 0.82857143 | 0.83333333 | 0.8 | 0.85714286 | 0.84166667 |
| Or_T1w_CE_Necrosis_Kbest | QDA     | 0.82857143 | 0.83333333 | 0.8 | 0.85714286 | 0.84166667 |
| Or_T1w_CE_Necrosis_Kbest | SVC     | 0.82857143 | 0.83333333 | 0.8 | 0.85714286 | 0.84166667 |
| Or_T1w_CE_Necrosis_Kbest | AB      | 0.82857143 | 0.83333333 | 0.8 | 0.85714286 | 0.84166667 |



[illegible]

[illegible]

|                         |         |            |            |     |            |            |
|-------------------------|---------|------------|------------|-----|------------|------------|
| Or_T1w_CE_Whole_mRmR    | ET      | 0.82857143 | 0.83333333 | 0.8 | 0.85714286 | 0.84166667 |
| Or_T1w_CE_Whole_mRmR    | QDA     | 0.82857143 | 0.83333333 | 0.8 | 0.85714286 | 0.84166667 |
| Or_T1w_CE_Whole_mRmR    | KN      | 0.8        | 0.83333333 | 0.6 | 1          | 0.88333333 |
| Or_T1w_CE_Whole_mRmR    | LDA     | 0.8        | 0.83333333 | 0.6 | 1          | 0.88333333 |
| Or_T1w_CE_Whole_mRmR    | Ridge   | 0.8        | 0.83333333 | 0.6 | 1          | 0.88333333 |
| Or_T2w_Flair_Core_Kbest | KN      | 0.8        | 0.83333333 | 0.6 | 1          | 0.88333333 |
| Or_T2w_Flair_Core_Kbest | LR      | 0.8        | 0.83333333 | 0.6 | 1          | 0.88333333 |
| Or_T2w_Flair_Core_Kbest | MLPC    | 0.8        | 0.83333333 | 0.6 | 1          | 0.88333333 |
| Or_T2w_Flair_Core_Kbest | ET      | 0.8        | 0.83333333 | 0.6 | 1          | 0.88333333 |
| Or_T2w_Flair_Core_Kbest | GB      | 0.8        | 0.83333333 | 0.6 | 1          | 0.88333333 |
| Or_T2w_Flair_Core_Kbest | MLPC    | 0.8        | 0.83333333 | 0.6 | 1          | 0.88333333 |
| Or_T2w_Flair_Core_Kbest | RF      | 0.8        | 0.83333333 | 0.6 | 1          | 0.88333333 |
| Or_T2w_Flair_Core_Kbest | Bagging | 0.8        | 0.83333333 | 0.6 | 1          | 0.88333333 |
| Or_T2w_Flair_Core_Kbest | ET      | 0.8        | 0.83333333 | 0.6 | 1          | 0.88333333 |
| Or_T2w_Flair_Core_Kbest | GNB     | 0.8        | 0.83333333 | 0.6 | 1          | 0.88333333 |
| Or_T2w_Flair_Core_Kbest | NC      | 0.8        | 0.83333333 | 0.6 | 1          | 0.88333333 |
| Or_T2w_Flair_Core_Kbest | QDA     | 0.8        | 0.83333333 | 0.6 | 1          | 0.88333333 |
| Or_T2w_Flair_Core_Kbest | RF      | 0.8        | 0.83333333 | 0.6 | 1          | 0.88333333 |
| Or_T2w_Flair_Core_Kbest | Bagging | 0.8        | 0.83333333 | 0.6 | 1          | 0.88333333 |
| Or_T2w_Flair_Core_Kbest | ET      | 0.8        | 0.83333333 | 0.6 | 1          | 0.88333333 |
| Or_T2w_Flair_Core_Kbest | GB      | 0.8        | 0.83333333 | 0.6 | 1          | 0.88333333 |
| Or_T2w_Flair_Core_Kbest | KN      | 0.8        | 0.83333333 | 0.6 | 1          | 0.88333333 |
| Or_T2w_Flair_Core_Kbest | NC      | 0.8        | 0.83333333 | 0.6 | 1          | 0.88333333 |
| Or_T2w_Flair_Core_RFE   | RF      | 0.8        | 0.83333333 | 0.6 | 1          | 0.88333333 |
| Or_T2w_Flair_Core_RFE   | Bagging | 0.8        | 0.83333333 | 0.6 | 1          | 0.88333333 |
| Or_T2w_Flair_Core_RFE   | HGB     | 0.8        | 0.83333333 | 0.6 | 1          | 0.88333333 |
| Or_T2w_Flair_Core_RFE   | MLPC    | 0.8        | 0.83333333 | 0.6 | 1          | 0.88333333 |
| Or_T2w_Flair_Core_RFE   | Ridge   | 0.8        | 0.83333333 | 0.6 | 1          | 0.88333333 |
| Or_T2w_Flair_Core_RFE   | NC      | 0.8        | 0.83333333 | 0.6 | 1          | 0.88333333 |
| Or_T2w_Flair_Core_RFE   | RF      | 0.8        | 0.83333333 | 0.6 | 1          | 0.88333333 |
| Or_T2w_Flair_Core_RFE   | DT      | 0.8        | 0.83333333 | 0.6 | 1          | 0.88333333 |
| Or_T2w_Flair_Core_RFE   | LDA     | 0.8        | 0.83333333 | 0.6 | 1          | 0.88333333 |
| Or_T2w_Flair_Core_RFE   | AB      | 0.8        | 0.83333333 | 0.6 | 1          | 0.88333333 |
| Or_T2w_Flair_Core_RFE   | Bagging | 0.8        | 0.83333333 | 0.6 | 1          | 0.88333333 |
| Or_T2w_Flair_Core_RFE   | GB      | 0.8        | 0.83333333 | 0.6 | 1          | 0.88333333 |
| Or_T2w_Flair_Core_RFE   | HGB     | 0.8        | 0.83333333 | 0.6 | 1          | 0.88333333 |
| Or_T2w_Flair_Core_RFE   | KN      | 0.8        | 0.83333333 | 0.6 | 1          | 0.88333333 |
| Or_T2w_Flair_Core_RFE   | MLPC    | 0.8        | 0.83333333 | 0.6 | 1          | 0.88333333 |
| Or_T2w_Flair_Core_RFE   | PA      | 0.8        | 0.83333333 | 0.6 | 1          | 0.88333333 |
| Or_T2w_Flair_Core_RFE   | SVC     | 0.8        | 0.83333333 | 0.6 | 1          | 0.88333333 |
| Or_T2w_Flair_Core_RFE   | GNB     | 0.78571429 | 0.75       | 1   | 0.57142857 | 0.8125     |
| Or_T2w_Flair_Core_mRmR  | GNB     | 0.78571429 | 0.75       | 1   | 0.57142857 | 0.8125     |
| Or_T2w_Flair_Core_mRmR  | HGB     | 0.78571429 | 0.75       | 1   | 0.57142857 | 0.8125     |
| Or_T2w_Flair_Core_mRmR  | HGB     | 0.78571429 | 0.75       | 1   | 0.57142857 | 0.8125     |

|                          |         |            |      |     |            |            |
|--------------------------|---------|------------|------|-----|------------|------------|
| Or_T2w_Flair_Core_mRmR   | SVC     | 0.78571429 | 0.75 | 1   | 0.57142857 | 0.8125     |
| Or_T2w_Flair_Core_mRmR   | DT      | 0.75714286 | 0.75 | 0.8 | 0.71428571 | 0.775      |
| Or_T2w_Flair_Core_mRmR   | GB      | 0.75714286 | 0.75 | 0.8 | 0.71428571 | 0.775      |
| Or_T2w_Flair_Core_mRmR   | Ridge   | 0.75714286 | 0.75 | 0.8 | 0.71428571 | 0.775      |
| Or_T2w_Flair_Core_mRmR   | DT      | 0.75714286 | 0.75 | 0.8 | 0.71428571 | 0.775      |
| Or_T2w_Flair_Core_mRmR   | KN      | 0.75714286 | 0.75 | 0.8 | 0.71428571 | 0.775      |
| Or_T2w_Flair_Core_mRmR   | HGB     | 0.75714286 | 0.75 | 0.8 | 0.71428571 | 0.775      |
| Or_T2w_Flair_Core_mRmR   | HGB     | 0.75714286 | 0.75 | 0.8 | 0.71428571 | 0.775      |
| Or_T2w_Flair_Core_mRmR   | GNB     | 0.75714286 | 0.75 | 0.8 | 0.71428571 | 0.775      |
| Or_T2w_Flair_Core_mRmR   | HGB     | 0.72857143 | 0.75 | 0.6 | 0.85714286 | 0.75833333 |
| Or_T2w_Flair_Core_mRmR   | HGB     | 0.72857143 | 0.75 | 0.6 | 0.85714286 | 0.75833333 |
| Or_T2w_Flair_Core_mRmR   | LR      | 0.72857143 | 0.75 | 0.6 | 0.85714286 | 0.75833333 |
| Or_T2w_Flair_Core_mRmR   | Ridge   | 0.72857143 | 0.75 | 0.6 | 0.85714286 | 0.75833333 |
| Or_T2w_Flair_Core_mRmR   | SVC     | 0.72857143 | 0.75 | 0.6 | 0.85714286 | 0.75833333 |
| Or_T2w_Flair_Core_mRmR   | AB      | 0.72857143 | 0.75 | 0.6 | 0.85714286 | 0.75833333 |
| Or_T2w_Flair_Edema_Kbest | Bagging | 0.72857143 | 0.75 | 0.6 | 0.85714286 | 0.75833333 |
| Or_T2w_Flair_Edema_Kbest | DT      | 0.72857143 | 0.75 | 0.6 | 0.85714286 | 0.75833333 |
| Or_T2w_Flair_Edema_Kbest | HGB     | 0.72857143 | 0.75 | 0.6 | 0.85714286 | 0.75833333 |
| Or_T2w_Flair_Edema_Kbest | LR      | 0.72857143 | 0.75 | 0.6 | 0.85714286 | 0.75833333 |
| Or_T2w_Flair_Edema_Kbest | PA      | 0.72857143 | 0.75 | 0.6 | 0.85714286 | 0.75833333 |
| Or_T2w_Flair_Edema_Kbest | LR      | 0.72857143 | 0.75 | 0.6 | 0.85714286 | 0.75833333 |
| Or_T2w_Flair_Edema_Kbest | AB      | 0.72857143 | 0.75 | 0.6 | 0.85714286 | 0.75833333 |
| Or_T2w_Flair_Edema_Kbest | DT      | 0.72857143 | 0.75 | 0.6 | 0.85714286 | 0.75833333 |
| Or_T2w_Flair_Edema_Kbest | HGB     | 0.72857143 | 0.75 | 0.6 | 0.85714286 | 0.75833333 |
| Or_T2w_Flair_Edema_Kbest | LDA     | 0.72857143 | 0.75 | 0.6 | 0.85714286 | 0.75833333 |
| Or_T2w_Flair_Edema_Kbest | QDA     | 0.72857143 | 0.75 | 0.6 | 0.85714286 | 0.75833333 |
| Or_T2w_Flair_Edema_Kbest | Ridge   | 0.72857143 | 0.75 | 0.6 | 0.85714286 | 0.75833333 |
| Or_T2w_Flair_Edema_Kbest | SVC     | 0.72857143 | 0.75 | 0.6 | 0.85714286 | 0.75833333 |
| Or_T2w_Flair_Edema_Kbest | AB      | 0.72857143 | 0.75 | 0.6 | 0.85714286 | 0.75833333 |
| Or_T2w_Flair_Edema_Kbest | GNB     | 0.72857143 | 0.75 | 0.6 | 0.85714286 | 0.75833333 |
| Or_T2w_Flair_Edema_Kbest | KN      | 0.72857143 | 0.75 | 0.6 | 0.85714286 | 0.75833333 |
| Or_T2w_Flair_Edema_Kbest | LDA     | 0.72857143 | 0.75 | 0.6 | 0.85714286 | 0.75833333 |
| Or_T2w_Flair_Edema_Kbest | MLPC    | 0.72857143 | 0.75 | 0.6 | 0.85714286 | 0.75833333 |
| Or_T2w_Flair_Edema_RFE   | QDA     | 0.72857143 | 0.75 | 0.6 | 0.85714286 | 0.75833333 |
| Or_T2w_Flair_Edema_RFE   | HGB     | 0.72857143 | 0.75 | 0.6 | 0.85714286 | 0.75833333 |
| Or_T2w_Flair_Edema_RFE   | KN      | 0.72857143 | 0.75 | 0.6 | 0.85714286 | 0.75833333 |
| Or_T2w_Flair_Edema_RFE   | LDA     | 0.72857143 | 0.75 | 0.6 | 0.85714286 | 0.75833333 |
| Or_T2w_Flair_Edema_RFE   | MLPC    | 0.72857143 | 0.75 | 0.6 | 0.85714286 | 0.75833333 |
| Or_T2w_Flair_Edema_RFE   | PA      | 0.72857143 | 0.75 | 0.6 | 0.85714286 | 0.75833333 |
| Or_T2w_Flair_Edema_RFE   | QDA     | 0.72857143 | 0.75 | 0.6 | 0.85714286 | 0.75833333 |
| Or_T2w_Flair_Edema_RFE   | Ridge   | 0.72857143 | 0.75 | 0.6 | 0.85714286 | 0.75833333 |
| Or_T2w_Flair_Edema_RFE   | SVC     | 0.72857143 | 0.75 | 0.6 | 0.85714286 | 0.75833333 |
| Or_T2w_Flair_Edema_RFE   | LR      | 0.72857143 | 0.75 | 0.6 | 0.85714286 | 0.75833333 |
| Or_T2w_Flair_Edema_RFE   | LR      | 0.72857143 | 0.75 | 0.6 | 0.85714286 | 0.75833333 |

|                              |       |            |            |     |            |            |
|------------------------------|-------|------------|------------|-----|------------|------------|
| Or_T2w_Flair_Edema_RFE       | AB    | 0.72857143 | 0.75       | 0.6 | 0.85714286 | 0.75833333 |
| Or_T2w_Flair_Edema_RFE       | KN    | 0.72857143 | 0.75       | 0.6 | 0.85714286 | 0.75833333 |
| Or_T2w_Flair_Edema_RFE       | NC    | 0.72857143 | 0.75       | 0.6 | 0.85714286 | 0.75833333 |
| Or_T2w_Flair_Edema_RFE       | QDA   | 0.72857143 | 0.75       | 0.6 | 0.85714286 | 0.75833333 |
| Or_T2w_Flair_Edema_RFE       | SVC   | 0.72857143 | 0.75       | 0.6 | 0.85714286 | 0.75833333 |
| Or_T2w_Flair_Edema_RFE       | NC    | 0.71428571 | 0.66666667 | 1   | 0.42857143 | 0.77777778 |
| Or_T2w_Flair_Edema_RFE       | NC    | 0.71428571 | 0.66666667 | 1   | 0.42857143 | 0.77777778 |
| Or_T2w_Flair_Edema_mRmR      | HGB   | 0.71428571 | 0.66666667 | 1   | 0.42857143 | 0.77777778 |
| Or_T2w_Flair_Edema_mRmR      | NC    | 0.71428571 | 0.66666667 | 1   | 0.42857143 | 0.77777778 |
| Or_T2w_Flair_Edema_mRmR      | LDA   | 0.7        | 0.75       | 0.4 | 1          | 0.825      |
| Or_T2w_Flair_Edema_mRmR      | LR    | 0.7        | 0.75       | 0.4 | 1          | 0.825      |
| Or_T2w_Flair_Edema_mRmR      | LR    | 0.7        | 0.75       | 0.4 | 1          | 0.825      |
| Or_T2w_Flair_Edema_mRmR      | LR    | 0.7        | 0.75       | 0.4 | 1          | 0.825      |
| Or_T2w_Flair_Edema_mRmR      | LR    | 0.7        | 0.75       | 0.4 | 1          | 0.825      |
| Or_T2w_Flair_Edema_mRmR      | LR    | 0.7        | 0.75       | 0.4 | 1          | 0.825      |
| Or_T2w_Flair_Edema_mRmR      | AB    | 0.7        | 0.75       | 0.4 | 1          | 0.825      |
| Or_T2w_Flair_Edema_mRmR      | LR    | 0.7        | 0.75       | 0.4 | 1          | 0.825      |
| Or_T2w_Flair_Edema_mRmR      | PA    | 0.7        | 0.75       | 0.4 | 1          | 0.825      |
| Or_T2w_Flair_Edema_mRmR      | LDA   | 0.7        | 0.75       | 0.4 | 1          | 0.825      |
| Or_T2w_Flair_Edema_mRmR      | LDA   | 0.7        | 0.75       | 0.4 | 1          | 0.825      |
| Or_T2w_Flair_Edema_mRmR      | LR    | 0.7        | 0.75       | 0.4 | 1          | 0.825      |
| Or_T2w_Flair_Edema_mRmR      | Ridge | 0.7        | 0.75       | 0.4 | 1          | 0.825      |
| Or_T2w_Flair_Edema_mRmR      | BNB   | 0.7        | 0.75       | 0.4 | 1          | 0.825      |
| Or_T2w_Flair_Edema_mRmR      | KN    | 0.7        | 0.75       | 0.4 | 1          | 0.825      |
| Or_T2w_Flair_Edema_mRmR      | LDA   | 0.7        | 0.75       | 0.4 | 1          | 0.825      |
| Or_T2w_Flair_Edema_mRmR      | MLPC  | 0.7        | 0.75       | 0.4 | 1          | 0.825      |
| Or_T2w_Flair_Enhancing_Kbest | PA    | 0.7        | 0.75       | 0.4 | 1          | 0.825      |
| Or_T2w_Flair_Enhancing_Kbest | Ridge | 0.7        | 0.75       | 0.4 | 1          | 0.825      |
| Or_T2w_Flair_Enhancing_Kbest | SVC   | 0.7        | 0.75       | 0.4 | 1          | 0.825      |
| Or_T2w_Flair_Enhancing_Kbest | Ridge | 0.7        | 0.75       | 0.4 | 1          | 0.825      |
| Or_T2w_Flair_Enhancing_Kbest | PA    | 0.7        | 0.75       | 0.4 | 1          | 0.825      |
| Or_T2w_Flair_Enhancing_Kbest | HGB   | 0.7        | 0.75       | 0.4 | 1          | 0.825      |
| Or_T2w_Flair_Enhancing_Kbest | GB    | 0.7        | 0.75       | 0.4 | 1          | 0.825      |
| Or_T2w_Flair_Enhancing_Kbest | PA    | 0.7        | 0.75       | 0.4 | 1          | 0.825      |
| Or_T2w_Flair_Enhancing_Kbest | RF    | 0.7        | 0.75       | 0.4 | 1          | 0.825      |
| Or_T2w_Flair_Enhancing_Kbest | GNB   | 0.7        | 0.75       | 0.4 | 1          | 0.825      |
| Or_T2w_Flair_Enhancing_Kbest | QDA   | 0.7        | 0.75       | 0.4 | 1          | 0.825      |
| Or_T2w_Flair_Enhancing_Kbest | ET    | 0.7        | 0.75       | 0.4 | 1          | 0.825      |
| Or_T2w_Flair_Enhancing_Kbest | GB    | 0.7        | 0.75       | 0.4 | 1          | 0.825      |
| Or_T2w_Flair_Enhancing_Kbest | HGB   | 0.7        | 0.75       | 0.4 | 1          | 0.825      |
| Or_T2w_Flair_Enhancing_Kbest | LR    | 0.7        | 0.75       | 0.4 | 1          | 0.825      |
| Or_T2w_Flair_Enhancing_Kbest | NC    | 0.7        | 0.75       | 0.4 | 1          | 0.825      |
| Or_T2w_Flair_Enhancing_Kbest | RF    | 0.7        | 0.75       | 0.4 | 1          | 0.825      |
| Or_T2w_Flair_Enhancing_Kbest | Ridge | 0.7        | 0.75       | 0.4 | 1          | 0.825      |
| Or_T2w_Flair_Enhancing_RFE   | LDA   | 0.7        | 0.75       | 0.4 | 1          | 0.825      |

|                              |         |            |            |     |            |            |
|------------------------------|---------|------------|------------|-----|------------|------------|
| Or_T2w_Flair_Enhancing_RFE   | LR      | 0.7        | 0.75       | 0.4 | 1          | 0.825      |
| Or_T2w_Flair_Enhancing_RFE   | Ridge   | 0.7        | 0.75       | 0.4 | 1          | 0.825      |
| Or_T2w_Flair_Enhancing_RFE   | HGB     | 0.68571429 | 0.66666667 | 0.8 | 0.57142857 | 0.72738095 |
| Or_T2w_Flair_Enhancing_RFE   | QDA     | 0.68571429 | 0.66666667 | 0.8 | 0.57142857 | 0.72738095 |
| Or_T2w_Flair_Enhancing_RFE   | QDA     | 0.68571429 | 0.66666667 | 0.8 | 0.57142857 | 0.72738095 |
| Or_T2w_Flair_Enhancing_RFE   | NC      | 0.68571429 | 0.66666667 | 0.8 | 0.57142857 | 0.72738095 |
| Or_T2w_Flair_Enhancing_RFE   | HGB     | 0.68571429 | 0.66666667 | 0.8 | 0.57142857 | 0.72738095 |
| Or_T2w_Flair_Enhancing_RFE   | HGB     | 0.68571429 | 0.66666667 | 0.8 | 0.57142857 | 0.72738095 |
| Or_T2w_Flair_Enhancing_RFE   | HGB     | 0.68571429 | 0.66666667 | 0.8 | 0.57142857 | 0.72738095 |
| Or_T2w_Flair_Enhancing_RFE   | QDA     | 0.68571429 | 0.66666667 | 0.8 | 0.57142857 | 0.72738095 |
| Or_T2w_Flair_Enhancing_RFE   | AB      | 0.65714286 | 0.66666667 | 0.6 | 0.71428571 | 0.68333333 |
| Or_T2w_Flair_Enhancing_RFE   | Bagging | 0.65714286 | 0.66666667 | 0.6 | 0.71428571 | 0.68333333 |
| Or_T2w_Flair_Enhancing_RFE   | DT      | 0.65714286 | 0.66666667 | 0.6 | 0.71428571 | 0.68333333 |
| Or_T2w_Flair_Enhancing_RFE   | ET      | 0.65714286 | 0.66666667 | 0.6 | 0.71428571 | 0.68333333 |
| Or_T2w_Flair_Enhancing_RFE   | GNB     | 0.65714286 | 0.66666667 | 0.6 | 0.71428571 | 0.68333333 |
| Or_T2w_Flair_Enhancing_RFE   | GB      | 0.65714286 | 0.66666667 | 0.6 | 0.71428571 | 0.68333333 |
| Or_T2w_Flair_Enhancing_RFE   | KN      | 0.65714286 | 0.66666667 | 0.6 | 0.71428571 | 0.68333333 |
| Or_T2w_Flair_Enhancing_mRmR  | MLPC    | 0.65714286 | 0.66666667 | 0.6 | 0.71428571 | 0.68333333 |
| Or_T2w_Flair_Enhancing_mRmR  | PA      | 0.65714286 | 0.66666667 | 0.6 | 0.71428571 | 0.68333333 |
| Or_T2w_Flair_Enhancing_mRmR  | RF      | 0.65714286 | 0.66666667 | 0.6 | 0.71428571 | 0.68333333 |
| Or_T2w_Flair_Enhancing_mRmR  | ET      | 0.65714286 | 0.66666667 | 0.6 | 0.71428571 | 0.68333333 |
| Or_T2w_Flair_Enhancing_mRmR  | GNB     | 0.65714286 | 0.66666667 | 0.6 | 0.71428571 | 0.68333333 |
| Or_T2w_Flair_Enhancing_mRmR  | LR      | 0.65714286 | 0.66666667 | 0.6 | 0.71428571 | 0.68333333 |
| Or_T2w_Flair_Enhancing_mRmR  | ET      | 0.65714286 | 0.66666667 | 0.6 | 0.71428571 | 0.68333333 |
| Or_T2w_Flair_Enhancing_mRmR  | GNB     | 0.65714286 | 0.66666667 | 0.6 | 0.71428571 | 0.68333333 |
| Or_T2w_Flair_Enhancing_mRmR  | LR      | 0.65714286 | 0.66666667 | 0.6 | 0.71428571 | 0.68333333 |
| Or_T2w_Flair_Enhancing_mRmR  | RF      | 0.65714286 | 0.66666667 | 0.6 | 0.71428571 | 0.68333333 |
| Or_T2w_Flair_Enhancing_mRmR  | Ridge   | 0.65714286 | 0.66666667 | 0.6 | 0.71428571 | 0.68333333 |
| Or_T2w_Flair_Enhancing_mRmR  | SVC     | 0.65714286 | 0.66666667 | 0.6 | 0.71428571 | 0.68333333 |
| Or_T2w_Flair_Enhancing_mRmR  | AB      | 0.65714286 | 0.66666667 | 0.6 | 0.71428571 | 0.68333333 |
| Or_T2w_Flair_Enhancing_mRmR  | ET      | 0.65714286 | 0.66666667 | 0.6 | 0.71428571 | 0.68333333 |
| Or_T2w_Flair_Enhancing_mRmR  | HGB     | 0.65714286 | 0.66666667 | 0.6 | 0.71428571 | 0.68333333 |
| Or_T2w_Flair_Enhancing_mRmR  | RF      | 0.65714286 | 0.66666667 | 0.6 | 0.71428571 | 0.68333333 |
| Or_T2w_Flair_Enhancing_mRmR  | GNB     | 0.65714286 | 0.66666667 | 0.6 | 0.71428571 | 0.68333333 |
| Or_T2w_Flair_Enhancing_mRmR  | HGB     | 0.64285714 | 0.58333333 | 1   | 0.28571429 | 0.75       |
| Or_T2w_Flair_Necrosis_Kbest  | PA      | 0.64285714 | 0.58333333 | 1   | 0.28571429 | 0.75       |
| Or_T2w_Flair_Enhancing_Kbest | LDA     | 0.62857143 | 0.66666667 | 0.4 | 0.85714286 | 0.65833333 |
| Or_T2w_Flair_Enhancing_Kbest | DT      | 0.62857143 | 0.66666667 | 0.4 | 0.85714286 | 0.65833333 |
| Or_T2w_Flair_Enhancing_Kbest | GNB     | 0.62857143 | 0.66666667 | 0.4 | 0.85714286 | 0.65833333 |
| Or_T2w_Flair_Enhancing_Kbest | QDA     | 0.62857143 | 0.66666667 | 0.4 | 0.85714286 | 0.65833333 |
| Or_T2w_Flair_Enhancing_Kbest | SVC     | 0.62857143 | 0.66666667 | 0.4 | 0.85714286 | 0.65833333 |
| Or_T2w_Flair_Enhancing_Kbest | AB      | 0.62857143 | 0.66666667 | 0.4 | 0.85714286 | 0.65833333 |
| Or_T2w_Flair_Enhancing_Kbest | KN      | 0.62857143 | 0.66666667 | 0.4 | 0.85714286 | 0.65833333 |
| Or_T2w_Flair_Enhancing_Kbest | RF      | 0.62857143 | 0.66666667 | 0.4 | 0.85714286 | 0.65833333 |

|                              |         |            |            |     |            |            |
|------------------------------|---------|------------|------------|-----|------------|------------|
| Or_T2w_Flair_Enhancing_Kbest | KN      | 0.62857143 | 0.66666667 | 0.4 | 0.85714286 | 0.65833333 |
| Or_T2w_Flair_Enhancing_Kbest | LR      | 0.62857143 | 0.66666667 | 0.4 | 0.85714286 | 0.65833333 |
| Or_T2w_Flair_Enhancing_Kbest | MLPC    | 0.62857143 | 0.66666667 | 0.4 | 0.85714286 | 0.65833333 |
| Or_T2w_Flair_Enhancing_Kbest | PA      | 0.62857143 | 0.66666667 | 0.4 | 0.85714286 | 0.65833333 |
| Or_T2w_Flair_Enhancing_Kbest | Ridge   | 0.62857143 | 0.66666667 | 0.4 | 0.85714286 | 0.65833333 |
| Or_T2w_Flair_Enhancing_Kbest | LR      | 0.62857143 | 0.66666667 | 0.4 | 0.85714286 | 0.65833333 |
| Or_T2w_Flair_Enhancing_Kbest | AB      | 0.62857143 | 0.66666667 | 0.4 | 0.85714286 | 0.65833333 |
| Or_T2w_Flair_Enhancing_Kbest | Bagging | 0.62857143 | 0.66666667 | 0.4 | 0.85714286 | 0.65833333 |
| Or_T2w_Flair_Enhancing_Kbest | KN      | 0.62857143 | 0.66666667 | 0.4 | 0.85714286 | 0.65833333 |
| Or_T2w_Flair_Enhancing_RFE   | MLPC    | 0.62857143 | 0.66666667 | 0.4 | 0.85714286 | 0.65833333 |
| Or_T2w_Flair_Enhancing_RFE   | PA      | 0.62857143 | 0.66666667 | 0.4 | 0.85714286 | 0.65833333 |
| Or_T2w_Flair_Enhancing_RFE   | SVC     | 0.62857143 | 0.66666667 | 0.4 | 0.85714286 | 0.65833333 |
| Or_T2w_Flair_Enhancing_RFE   | GNB     | 0.62857143 | 0.66666667 | 0.4 | 0.85714286 | 0.65833333 |
| Or_T2w_Flair_Enhancing_RFE   | GB      | 0.62857143 | 0.66666667 | 0.4 | 0.85714286 | 0.65833333 |
| Or_T2w_Flair_Enhancing_RFE   | LR      | 0.62857143 | 0.66666667 | 0.4 | 0.85714286 | 0.65833333 |
| Or_T2w_Flair_Enhancing_RFE   | MLPC    | 0.62857143 | 0.66666667 | 0.4 | 0.85714286 | 0.65833333 |
| Or_T2w_Flair_Enhancing_RFE   | Ridge   | 0.62857143 | 0.66666667 | 0.4 | 0.85714286 | 0.65833333 |
| Or_T2w_Flair_Enhancing_RFE   | NC      | 0.62857143 | 0.66666667 | 0.4 | 0.85714286 | 0.65833333 |
| Or_T2w_Flair_Enhancing_RFE   | AB      | 0.61428571 | 0.58333333 | 0.8 | 0.42857143 | 0.69166667 |
| Or_T2w_Flair_Enhancing_RFE   | Bagging | 0.61428571 | 0.58333333 | 0.8 | 0.42857143 | 0.69166667 |
| Or_T2w_Flair_Enhancing_RFE   | DT      | 0.61428571 | 0.58333333 | 0.8 | 0.42857143 | 0.69166667 |
| Or_T2w_Flair_Enhancing_RFE   | Bagging | 0.6        | 0.66666667 | 0.2 | 1          | 0.76666667 |
| Or_T2w_Flair_Enhancing_RFE   | GB      | 0.6        | 0.66666667 | 0.2 | 1          | 0.76666667 |
| Or_T2w_Flair_Enhancing_RFE   | BNB     | 0.6        | 0.66666667 | 0.2 | 1          | 0.76666667 |
| Or_T2w_Flair_Enhancing_RFE   | BNB     | 0.6        | 0.66666667 | 0.2 | 1          | 0.76666667 |
| Or_T2w_Flair_Enhancing_RFE   | LR      | 0.6        | 0.66666667 | 0.2 | 1          | 0.76666667 |
| Or_T2w_Flair_Enhancing_RFE   | HGB     | 0.6        | 0.66666667 | 0.2 | 1          | 0.76666667 |
| Or_T2w_Flair_Enhancing_mRmR  | ET      | 0.6        | 0.66666667 | 0.2 | 1          | 0.76666667 |
| Or_T2w_Flair_Enhancing_mRmR  | LDA     | 0.6        | 0.66666667 | 0.2 | 1          | 0.76666667 |
| Or_T2w_Flair_Enhancing_mRmR  | LR      | 0.6        | 0.66666667 | 0.2 | 1          | 0.76666667 |
| Or_T2w_Flair_Enhancing_mRmR  | MLPC    | 0.6        | 0.66666667 | 0.2 | 1          | 0.76666667 |
| Or_T2w_Flair_Enhancing_mRmR  | Ridge   | 0.6        | 0.66666667 | 0.2 | 1          | 0.76666667 |
| Or_T2w_Flair_Enhancing_mRmR  | SVC     | 0.6        | 0.66666667 | 0.2 | 1          | 0.76666667 |
| Or_T2w_Flair_Enhancing_mRmR  | BNB     | 0.6        | 0.66666667 | 0.2 | 1          | 0.76666667 |
| Or_T2w_Flair_Enhancing_mRmR  | BNB     | 0.6        | 0.66666667 | 0.2 | 1          | 0.76666667 |
| Or_T2w_Flair_Enhancing_mRmR  | BNB     | 0.6        | 0.66666667 | 0.2 | 1          | 0.76666667 |
| Or_T2w_Flair_Enhancing_mRmR  | NC      | 0.58571429 | 0.58333333 | 0.6 | 0.57142857 | 0.63333333 |
| Or_T2w_Flair_Enhancing_mRmR  | KN      | 0.58571429 | 0.58333333 | 0.6 | 0.57142857 | 0.63333333 |
| Or_T2w_Flair_Enhancing_mRmR  | Bagging | 0.58571429 | 0.58333333 | 0.6 | 0.57142857 | 0.63333333 |
| Or_T2w_Flair_Enhancing_mRmR  | MLPC    | 0.58571429 | 0.58333333 | 0.6 | 0.57142857 | 0.63333333 |
| Or_T2w_Flair_Enhancing_mRmR  | NC      | 0.58571429 | 0.58333333 | 0.6 | 0.57142857 | 0.63333333 |
| Or_T2w_Flair_Enhancing_mRmR  | AB      | 0.58571429 | 0.58333333 | 0.6 | 0.57142857 | 0.63333333 |
| Or_T2w_Flair_Enhancing_mRmR  | GNB     | 0.58571429 | 0.58333333 | 0.6 | 0.57142857 | 0.63333333 |
| Or_T2w_Flair_Enhancing_mRmR  | PA      | 0.58571429 | 0.58333333 | 0.6 | 0.57142857 | 0.63333333 |



|                             |         |            |            |     |            |            |
|-----------------------------|---------|------------|------------|-----|------------|------------|
| Or_T2w_Flair_Enhancing_mRmR | LDA     | 0.55714286 | 0.58333333 | 0.4 | 0.71428571 | 0.575      |
| Or_T2w_Flair_Whole_Kbest    | Bagging | 0.55714286 | 0.58333333 | 0.4 | 0.71428571 | 0.575      |
| Or_T2w_Flair_Whole_Kbest    | GB      | 0.55714286 | 0.58333333 | 0.4 | 0.71428571 | 0.575      |
| Or_T2w_Flair_Whole_Kbest    | QDA     | 0.52857143 | 0.58333333 | 0.2 | 0.85714286 | 0.51666667 |
| Or_T2w_Flair_Whole_Kbest    | DT      | 0.52857143 | 0.58333333 | 0.2 | 0.85714286 | 0.51666667 |
| Or_T2w_Flair_Whole_Kbest    | LDA     | 0.52857143 | 0.58333333 | 0.2 | 0.85714286 | 0.51666667 |
| Or_T2w_Flair_Whole_Kbest    | NC      | 0.52857143 | 0.58333333 | 0.2 | 0.85714286 | 0.51666667 |
| Or_T2w_Flair_Whole_Kbest    | QDA     | 0.52857143 | 0.58333333 | 0.2 | 0.85714286 | 0.51666667 |
| Or_T2w_Flair_Whole_Kbest    | ET      | 0.52857143 | 0.58333333 | 0.2 | 0.85714286 | 0.51666667 |
| Or_T2w_Flair_Whole_Kbest    | KN      | 0.52857143 | 0.58333333 | 0.2 | 0.85714286 | 0.51666667 |
| Or_T2w_Flair_Whole_Kbest    | NC      | 0.52857143 | 0.58333333 | 0.2 | 0.85714286 | 0.51666667 |
| Or_T2w_Flair_Whole_Kbest    | BNB     | 0.52857143 | 0.58333333 | 0.2 | 0.85714286 | 0.51666667 |
| Or_T2w_Flair_Whole_Kbest    | RF      | 0.51428571 | 0.5        | 0.6 | 0.42857143 | 0.59761905 |
| Or_T2w_Flair_Whole_Kbest    | AB      | 0.51428571 | 0.5        | 0.6 | 0.42857143 | 0.59761905 |
| Or_T2w_Flair_Whole_Kbest    | BNB     | 0.5        | 0.58333333 | 0   | 1          | 0.70833333 |
| Or_T2w_Flair_Whole_Kbest    | BNB     | 0.5        | 0.58333333 | 0   | 1          | 0.70833333 |
| Or_T2w_Flair_Whole_Kbest    | BNB     | 0.5        | 0.58333333 | 0   | 1          | 0.70833333 |
| Or_T2w_Flair_Whole_Kbest    | QDA     | 0.5        | 0.58333333 | 0   | 1          | 0.70833333 |
| Or_T2w_Flair_Whole_Kbest    | BNB     | 0.5        | 0.58333333 | 0   | 1          | 0.70833333 |
| Or_T2w_Flair_Whole_RFE      | BNB     | 0.5        | 0.58333333 | 0   | 1          | 0.70833333 |
| Or_T2w_Flair_Whole_RFE      | BNB     | 0.5        | 0.58333333 | 0   | 1          | 0.70833333 |
| Or_T2w_Flair_Whole_RFE      | BNB     | 0.5        | 0.58333333 | 0   | 1          | 0.70833333 |
| Or_T2w_Flair_Whole_RFE      | BNB     | 0.5        | 0.58333333 | 0   | 1          | 0.70833333 |
| Or_T2w_Flair_Whole_RFE      | BNB     | 0.5        | 0.58333333 | 0   | 1          | 0.70833333 |
| Or_T2w_Flair_Whole_RFE      | BNB     | 0.5        | 0.58333333 | 0   | 1          | 0.70833333 |
| Or_T2w_Flair_Whole_RFE      | BNB     | 0.5        | 0.58333333 | 0   | 1          | 0.70833333 |
| Or_T2w_Flair_Whole_RFE      | BNB     | 0.5        | 0.58333333 | 0   | 1          | 0.70833333 |
| Or_T2w_Flair_Whole_RFE      | BNB     | 0.5        | 0.58333333 | 0   | 1          | 0.70833333 |
| Or_T2w_Flair_Whole_RFE      | LR      | 0.5        | 0.58333333 | 0   | 1          | 0.70833333 |
| Or_T2w_Flair_Whole_RFE      | BNB     | 0.5        | 0.58333333 | 0   | 1          | 0.70833333 |
| Or_T2w_Flair_Whole_RFE      | BNB     | 0.5        | 0.58333333 | 0   | 1          | 0.70833333 |
| Or_T2w_Flair_Whole_RFE      | BNB     | 0.5        | 0.58333333 | 0   | 1          | 0.70833333 |
| Or_T2w_Flair_Whole_RFE      | KN      | 0.5        | 0.58333333 | 0   | 1          | 0.70833333 |
| Or_T2w_Flair_Whole_RFE      | LR      | 0.5        | 0.58333333 | 0   | 1          | 0.70833333 |
| Or_T2w_Flair_Whole_RFE      | MLPC    | 0.5        | 0.58333333 | 0   | 1          | 0.70833333 |
| Or_T2w_Flair_Whole_RFE      | Ridge   | 0.5        | 0.58333333 | 0   | 1          | 0.70833333 |
| Or_T2w_Flair_Whole_RFE      | SVC     | 0.5        | 0.58333333 | 0   | 1          | 0.70833333 |
| Or_T2w_Flair_Whole_RFE      | LR      | 0.5        | 0.58333333 | 0   | 1          | 0.70833333 |
| Or_T2w_Flair_Whole_mRmR     | BNB     | 0.5        | 0.58333333 | 0   | 1          | 0.70833333 |
| Or_T2w_Flair_Whole_mRmR     | BNB     | 0.5        | 0.58333333 | 0   | 1          | 0.70833333 |
| Or_T2w_Flair_Whole_mRmR     | BNB     | 0.5        | 0.58333333 | 0   | 1          | 0.70833333 |
| Or_T2w_Flair_Whole_mRmR     | BNB     | 0.5        | 0.58333333 | 0   | 1          | 0.70833333 |
| Or_T2w_Flair_Whole_mRmR     | BNB     | 0.5        | 0.58333333 | 0   | 1          | 0.70833333 |
| Or_T2w_Flair_Whole_mRmR     | BNB     | 0.5        | 0.58333333 | 0   | 1          | 0.70833333 |
| Or_T2w_Flair_Whole_mRmR     | AB      | 0.45714286 | 0.5        | 0.2 | 0.71428571 | 0.43333333 |

|                         |         |            |            |     |            |            |
|-------------------------|---------|------------|------------|-----|------------|------------|
| Or_T2w_Flair_Whole_mRmR | ET      | 0.45714286 | 0.5        | 0.2 | 0.71428571 | 0.43333333 |
| Or_T2w_Flair_Whole_mRmR | RF      | 0.45714286 | 0.5        | 0.2 | 0.71428571 | 0.43333333 |
| Or_T2w_Flair_Whole_mRmR | BNB     | 0.42857143 | 0.5        | 0   | 0.85714286 | 0.20833333 |
| Or_T2w_Flair_Whole_mRmR | Bagging | 0.42857143 | 0.5        | 0   | 0.85714286 | 0.20833333 |
| Or_T2w_Flair_Whole_mRmR | GNB     | 0.42857143 | 0.5        | 0   | 0.85714286 | 0.20833333 |
| Or_T2w_Flair_Whole_mRmR | GB      | 0.42857143 | 0.5        | 0   | 0.85714286 | 0.20833333 |
| Or_T2w_Flair_Whole_mRmR | PA      | 0.42857143 | 0.5        | 0   | 0.85714286 | 0.20833333 |
| Or_T2w_Flair_Whole_mRmR | PA      | 0.42857143 | 0.5        | 0   | 0.85714286 | 0.20833333 |
| Or_T2w_Flair_Whole_mRmR | LR      | 0.42857143 | 0.5        | 0   | 0.85714286 | 0.20833333 |
| Or_T2w_Flair_Whole_mRmR | GB      | 0.41428571 | 0.41666667 | 0.4 | 0.42857143 | 0.49166667 |
| Or_T2w_Flair_Whole_mRmR | BNB     | 0.38571429 | 0.41666667 | 0.2 | 0.57142857 | 0.39166667 |
